# The mutational signatures of formalin fixation on the human genome

Qingli Guo<sup>1,2,3</sup>, Eszter Lakatos<sup>2</sup>, Ibrahim Al Bakir<sup>2</sup>, Kit Curtius<sup>2</sup>, Trevor A. Graham<sup>2,\*</sup>, Ville Mustonen<sup>1,3,\*</sup>

1. Organismal and Evolutionary Biology Research Programme, Department of Computer Science, University of Helsinki, 00014 Helsinki, Finland.

2. Evolution and Cancer Laboratory, Centre for Genomics and Computational Biology, Barts Cancer Institute, Barts and the London School of Medicine and Dentistry, Queen Mary University of London, Charterhouse Sq, London, EC1M 6BQ, UK.

3. Institute of Biotechnology, Helsinki Institute for Information Technology, University of Helsinki, 00014 Helsinki, Finland.

\* correspondence to [t.graham@qmul.ac.uk](mailto:t.graham@qmul.ac.uk) or [v.mustonen@helsinki.fi](mailto:v.mustonen@helsinki.fi)

Contact information of the authors

| Name                                  | Email address          |
|---------------------------------------|------------------------|
| <b>Qingli Guo<sup>1,2,3</sup></b>     | qingli.guo@helsinki.fi |
| <b>Eszter Lakatos<sup>2</sup></b>     | e.lakatos@qmul.ac.uk   |
| <b>Ibrahim Al Bakir<sup>2</sup></b>   | i.albakir@qmul.ac.uk   |
| <b>Kit Curtius<sup>2</sup></b>        | k.curtius@qmul.ac.uk   |
| <b>Trevor A. Graham<sup>2,*</sup></b> | t.graham@qmul.ac.uk    |
| <b>Ville Mustonen<sup>1,3,*</sup></b> | v.mustonen@helsinki.fi |

15

## 16 **Abstract**

### 17 **Background**

18 Formalin fixation and paraffin embedding (FFPE) of patient material remains standard practice in  
19 clinical pathology labs around the world. Clinical archives of patient material near-exclusively consist  
20 of FFPE blocks. The ability to perform high quality genome sequencing on FFPE-derived DNA would  
21 accelerate a broad spectrum of medical research. However, formalin is a recognised mutagen and  
22 sequencing of DNA derived from FFPE material is known to be riddled with artefactual mutations.

### 23 **Results**

24 Here we derive genome-wide mutational signatures caused by formalin fixation, and provide a  
25 computational method to correct mutational profiles for these formalin-induced artefacts. We show that  
26 the FFPE-signature is dominated by C>T transitions caused by cytosine deamination, and has very high  
27 similarity to COSMIC signature SBS30 (base excision repair deficiency due to inactivation mutations  
28 in *NTHL1*). Further, we demonstrate that chemical repair of formalin-induced DNA lesions, a process  
29 that is routinely performed as part of sequencing library preparation, leads to a signature highly similar  
30 to COSMIC signature SBS1 (spontaneous deamination of methylated cytosine). Next, we design  
31 FFPEsig, a computational method to remove the formalin-induced artefacts from mutational counts.  
32 We prove the efficacy of this method by generating synthetic FFPE samples using 2,780 cancer  
33 genomes from the Pan-Cancer Analysis of Whole Genome (PCAWG) project, and via analysis of FFPE-  
34 derived genome sequencing data from colorectal cancers.

### 35 **Conclusions**

36 Formalin fixation leaves a predictable mutational footprint across the genome. The application of our  
37 FFPEsig software corrects the mutational profile for the influence of formalin, enabling robust  
38 mutational signature analysis in FFPE-derived patient material.

39

## 40 **Keywords**

41 Formalin fixation paraffin embedding (FFPE), mutational signatures, artefact correction, computational  
42 genomics

43

## 44 **Background**

45 Patient samples are routinely processed with formalin fixation and paraffin embedding (FFPE) by  
46 pathology laboratories around the world. FFPE preserves tissue morphology and enables  
47 immunohistochemical analysis for clinical diagnosis [1,2]. However, genomic analysis of DNA  
48 extracted from FFPE blocks is problematic, as formalin fixation negatively impacts DNA quantity and  
49 quality compared to fresh frozen (FF) material [3,4]. The pathology archive of any large hospital is  
50 likely to contain tens of thousands of FFPE blocks. Enabling accurate genomic analysis of FFPE  
51 material would unlock the tremendous translational research potential of these vast collections of  
52 archival material.

53

54 During fixation step of FFPE preservation, buffered formalin (4% formaldehyde) penetrates the  
55 biospecimen and generates cross-links between intracellular macromolecules (DNA-DNA, DNA-RNA  
56 and DNA-protein). These crosslinks stall DNA polymerases during library amplification [5–7]. As a  
57 consequence, the diversity and the number of templates that can be amplified by PCR from FFPE DNA  
58 is significantly depleted [4,8]. Furthermore, formalin causes hydrolytic deamination of cytosine bases  
59 to uracil [1,5], resulting in U:G mismatches where DNA polymerase incorporates adenine opposite to  
60 uracil in amplicon-based protocols, generating artefactual C:G>T:A substitutions in sequencing data  
61 [5,9,10].

62

63 To mitigate deamination artefacts, some FFPE sequencing library preparations include “repair  
64 treatment” whereby uracil DNA glycosylase (UDG) is added to remove uracil bases prior to  
65 amplification [9–11]. However, for 5-methylcytosine (5mC) in CpG dinucleotides, deamination by

66 formalin would be converted directly to thymine instead of uracil [3,8]. This second class of formalin  
67 artefact is not corrected by the repair treatment therefore, downstream bioinformatics approaches are  
68 necessary to attempt their removal [5].

69

70 Mutational signatures derived from whole genome sequencing (WGS) data characterise the mutational  
71 processes that have acted upon the DNA within a sample [12,13], and they hold tremendous potential  
72 for diagnosis and therapeutic guidance [14–18]. Single base substitution (SBS) signatures are derived  
73 by considering the type of specific base pair change (e.g. C>T or C>A, *etc.*) together with the flanking  
74 base pair context (e.g. ACA>ATA, or ACA>AAA, *etc.*) [12,13]. The recently updated mutational  
75 signature catalogue provides a comprehensive source of mutational processes active in human cancers  
76 that is derived from an unprecedentedly large number of samples [19]. As the artefactual mutations  
77 from FFPE preservation will bias mutational profiles, they have to be taken into account when  
78 unravelling mutational processes from FFPE samples.

79

80 Here, we use the statistical machinery of mutational signature analysis to derive mutational footprint  
81 caused by formalin exposure during FFPE biospecimen processing. First, we identify the “formalin  
82 artefact” mutational signatures in both unrepaired and repaired FFPE samples, using paired FFPE and  
83 FF sequencing data from the same samples. We next design and validate a decomposition algorithm,  
84 FFPEsig, to subtract FFPE artefacts and thereby infer mutational profiles of biological origin in genome  
85 sequencing data from an FFPE specimen. Our method enables robust mutational profile correction of  
86 FFPE samples for research and potential clinical implementation.

## 87 **Results**

### 88 **Mutational signatures of formalin fixation**

#### 89 **Formalin fixation artefacts are predominantly C>T mutations**

90 To identify artefacts signatures, we used publicly available targeted panel sequencing data from two  
91 previous studies [8,11], in which triplicate samples (FFPE-repaired, FFPE-unrepaired and FF) were  
92 available. The study by Prentice *et al.* (hereafter study 1) comprised colorectal cancers ( $n=3$ ), and each  
93 cancer included nine samples: one FF sample, four unrepaired and four repaired FFPE samples that  
94 were sequenced after a fixation time of 2, 15, 24 and 48 hours respectively. In addition, study 1 included  
95 patients ( $n=29$ ) for whom repaired and unrepaired FFPEs were available. In the study by Bhagwate *et*  
96 *al.* (hereafter study 2), triplicate samples from benign breast tissue ( $n=4$ ) were available. In total, we  
97 obtained 110 FFPE samples, of which 32 (29%) had matched FF (see Methods & Materials).

98  
99 We first focused on samples with matched FF available, and examined the set of mutations detected in  
100 FFPE samples but not detected in matched FF samples (termed FFPE-only or discordant mutations).  
101 Within the study 1 sample set, we discovered that C>T discordant mutations were common (45.8% and  
102 21.1% in unrepaired and repaired samples, respectively). T>C mutations were also common (53.5%  
103 and 76.3% in unrepaired and repaired FFPEs, respectively; Supplemental Fig 1). Discordant FFPE-only  
104 mutations from study 2 also tended to be C>T mutations (98.9% in unrepaired and 76.6% in repaired  
105 FFPEs), but very few T>C mutations were detected in this second study (0.55% in unrepaired and  
106 11.6% in repaired FFPEs; Supplemental Fig 2).

107  
108 To examine whether T>C mutations were true artefacts of FFPE, we counted the proportion of C>T  
109 and T>C mutations present in two or more of the set of samples from a patient ('concordant mutations').  
110 On average, about 30% C>T mutations were shared by at least two samples, in contrast to 88% for T>C  
111 mutations (Supplemental Fig 3a). We next compared frequencies of concordant mutations between all  
112 sample-pairs across three patients: 12% of C>T mutations and 59% of T>C mutations were shared by

113 one sample-pair on average (Supplemental Fig 3b). Furthermore, C>T discordant mutation loads  
114 increased with formalin fixation time in both repaired (slope=0.80, intercept=89.68) and unrepaired  
115 FFPE samples (slope=7.48, intercept=164.81) (Fig 1a). However, the T>C discordant mutation loads  
116 decreased with fixation time in unrepaired FFPE (slope=-0.63, intercept=350.85), but increased in  
117 repaired FFPEs (slope=1.02, intercept=364.62) (Supplemental Fig1). Taken together, our results  
118 suggested that C>T mutations are the predominant true formalin induced artefacts, and that T>C  
119 mutations are likely caused by other sources of mutational noise rather than formalin fixation.

120 Unrepaired formalin signature is highly similar to SBS30; repaired formalin  
121 signature is highly similar to SBS1

122 We next used all FFPE-only mutations (T>C excluded) to learn FFPE signatures. Analysis was  
123 performed on all FFPE samples (n=110). The samples in the respective studies were sequenced using  
124 different cancer gene panels, thus the ‘mutational opportunities’, determined by the frequency of each  
125 trinucleotide context in the panel, differed between studies (Supplemental Fig 4). Therefore, we applied  
126 the study-specific normalisation on the mutation counts to enable direct comparison between the studies  
127 (see Methods & Materials). The cluster of normalised mutational profiles from the entire combined set  
128 of n=110 FFPE samples was represented using t-distributed stochastic neighbour embedding (t-SNE)  
129 [20] (Fig 1b). Samples from the two studies showed no batch effect and clearly separated into two  
130 clusters of unrepaired and repaired samples. A single repaired sample from study 1 clustered with  
131 unrepaired FFPEs, which we suspect is due to poor response to UDG treatment [21]. In addition, we  
132 clustered T>C mutational profiles after normalisation, but discovered a clear batch effect and found no  
133 consistent error patterns (Supplemental Fig 3c).

134

135 To exclude possible outliers, we used t-SNE clustering to select representative samples. We performed  
136 an iterative process where each iteration was defined by the random seed inputted to the t-SNE  
137 algorithm. For each t-SNE embedding, we calculated the spatial density of the clustered data measured  
138 by a gaussian kernel, and selected samples in regions of high density (density>0.018) as our  
139 representative sample subset (Supplemental Fig 5a). The averaged values of all mutation channels from

140 this representative subset generated one set of FFPE signature candidates. Our final FFPE signatures  
141 were derived from the mean of 100 candidates collected from 100 t-SNE embeddings (Supplemental  
142 Fig 5b and 5c; Supplemental Table 1).

143

144 We then compared the derived FFPE artefact profiles to the latest COSMIC SBS signatures (V3 - May  
145 2019) [19] (Fig 1c), and found that unrepaired and repaired FFPE signatures are highly similar to SBS30  
146 and SBS1 respectively (cosine similarity 0.90 for both; Fig 1d and 1e). SBS30 has been validated as a  
147 mutational footprint of *NTHL1* mutations that disrupt base excision repair (BER) [22,23]. SBS1 is well-  
148 known as a ‘clock-like’ signature that positively correlates with patient age, as a consequence of  
149 spontaneous deamination of methylcytosine [24]. We note that the unrepaired FFPE signature shared  
150 even greater similarity with COSMIC V2 (March 2015) signature 1 (0.95), which was inferred from a  
151 smaller cohort compared to SBS1 of V3.

152

153 Despite the high similarity, there were certain mutation channels that differed between FFPE signatures  
154 and the two known mutational processes. We marked the mutation channels if the fold-change was over  
155 2 (Fig 1d and 1e). Unrepaired FFPE signature differs in NCT context. The repaired FFPE signature  
156 mostly differs in non-CpG mutation channels which are absent in SBS1(V3) but present in sig 1 (V2).  
157 Those small proportions of mutations in non-CpG channels of repaired FFPE signature are likely due  
158 to the artefactual mutations escaped from the UDG repairing process.

## 159 Development and validation of FFPE artefacts correction algorithm 160 using synthesised data

161 We designed and implemented an algorithm we called “FFPEsig” to correct artefacts from FFPE  
162 mutational profiles (see Methods & Materials). The algorithm decomposes the observed aggregate  
163 mutational catalogue of one given FFPE sample as the combination of FFPE-artefacts and the true  
164 biological mutations. To test the performance of the method, we added FFPE-artefacts to all PCAWG  
165 samples *in silico*, and then attempted to remove these artefacts using FFPEsig [19,25]. Fig 2a shows the

166 true, simulated and corrected profiles for one colorectal cancer (CRC) sample. In this case, FFPEsig  
167 successfully inferred the biological mutation catalogue with  $\sim 0.99$  accuracy, measured by cosine  
168 similarity on C>T channels. The correction accuracy was slightly higher when we used the full 96-  
169 channel (Supplemental Fig 6), but the predominance of formalin associated mutations in the C>T  
170 channels meant the gain was minimal. Therefore, hereafter we evaluated our correction accuracy  
171 focusing only on C>T mutation channels.

172

173 Overall, FFPEsig achieved 0.89 mean correction accuracy for both unrepaired (95% CI: 0.885, 0.893)  
174 and repaired FFPEs (95% CI: 0.887, 0.894) (Fig 2b and 2c). To examine the possible factors which  
175 could influence the artefact correction, we evaluated 1) biological mutation count; 2) the similarities  
176 between the artefact signature (the ‘noise’) and the true biological mutation catalogue (the ‘signal’).  
177 Poorly corrected cases were due to low mutation load and/or high similarity of patterns shared between  
178 the noise and signal (Fig 2b). We noticed that samples with low biological mutation load were difficult  
179 to correct regardless of how different the mutation patterns are from the FFPE signatures (purple dots  
180 in Fig 2b). We further separated these two factors and confirmed that higher biological mutation burden  
181 led to more accurate correction (Fig 2d), as well as high dissimilarity between the signal and the noise  
182 (Fig 2e; cases with low mutation load excluded).

183

184 We continued our *in silico* evaluation by examining correction performance across cancer types for  
185 simulated unrepaired and repaired FFPEs within each cancer type (Fig 2c). The efficacy of correction  
186 varied significantly across 26 cancer types. FFPEsig was most accurate in skin melanoma (mean: 0.98)  
187 due to its high mutation load (96,361 SBSs) and low similarity to the noise signatures (0.55) for both  
188 FFPE samples, followed by bladder transitional cell carcinoma (Bladder-TCC, 0.97) and lung squamous  
189 cell carcinoma (Lung-SCC, 0.96). In contrast, FFPEsig performed poorly for pilocytic astrocytoma  
190 (CNS-PiloAstro, 0.61), thyroid adenocarcinoma (Thy-AdenoCA, 0.80) and medulloblastoma (CNS-  
191 Medullo, 0.82), because of the low averaged mutation loads (from 112 to 602) and relatively higher  
192 similarity to the noise signatures (0.69-0.74) in these cancer types.

193



194 We also noticed that the algorithm had different performance between unrepaired and repaired FFPEs  
195 within certain cancer types. There were 17 out of 26 cancer types with detectable difference in  
196 correction efficacy ( $p$ -value  $< 0.05$ ) and 12 of 17 with a highly significant difference ( $p$ -value  $< 0.001$ ).  
197 For instance, the correction worked much better in unrepaired FFPEs for colorectal (ColoRect-  
198 AdenoCA) and pancreatic adenocarcinoma (Panc-AdenoCA), with 98% and 92% of well-corrected  
199 samples for unrepaired FFPEs respectively, in contrast to only 71% and 51% respectively for repaired  
200 ones. Since the mutation burdens were the same for two types of FFPEs within a cancer type, the  
201 significant difference is caused by true mutations being more dissimilar to the FFPE-artefact profile in  
202 unrepaired FFPEs (cosine similarity 0.49 for CRCs and 0.59 for pancreatic cancers), whereas the  
203 repaired-FFPE mutational signature was very similar to the true mutational profile (cosine similarity  
204 0.89 and 0.90 colorectal and pancreatic cancer respectively). By contrast, FFPEsig worked successfully  
205 in repaired-FFPEs for Lung-SCC and liver hepatocellular carcinoma (Liver-HCC), with 100% and 96%  
206 well-corrected samples for the opposite reason.

207

208 Finally, we explored how the accuracy of FFPE-artefact removal changes with increasing noise of FFPE  
209 artefacts (Fig 2f). We selected four cancer types with 80% or more well-corrected samples in both  
210 repaired and unrepaired FFPEs, including 219 tumour samples from CNS-GBM, Skin-Melanoma,  
211 Bladder-TCC and Lung-SCC (Fig 2c). As expected, as the burden of artefactual mutations was  
212 increased, the correction accuracy dropped from 0.97 to 0.86 in unrepaired FFPEs, and from 0.98 to  
213 0.84 in repaired FFPEs. Overall, FFPEsig performed equally well in both types of FFPE with up to  $10^5$   
214 noise (mean accuracy  $> 0.94$ ), but its performance dropped dramatically for samples with  $10^6$  noise  
215 (0.84-0.86). Thus, our method works for samples that hold reasonable signal-to-noise ratio, but not for  
216 the extreme cases, e.g. samples with  $10^6$  noise in this experiment with signal-to-noise ratio around  
217 0.0088.

## 218 A case study of correcting FFPE artefacts in WGS FFPE CRC blocks 219 shows consistent results with simulated data

220 Next, we performed whole genome sequencing on two tumour FFPE samples (unrepaired versus  
221 repaired), and on the normal tissue DNA as matched normal from the same CRC patient (see Methods  
222 & Materials; FF material was not available). The mean coverages of the sequencing data were 46X  
223 (unrepaired FFPE), 43X (repaired FFPE) and 43X (normal sample), with 98.81% or more of reads  
224 mapped to the genome (Supplemental Table 2). Following filtering (see Methods & Materials), we  
225 detected 13,208 and 6,107 somatic single base substitutions in unrepaired and repaired FFPE,  
226 respectively (Supplemental Fig 7a and 7b). In particular, the two types of dominant mutations in our  
227 FFPE samples were C>T and T>C, and together they contributed 64.7%-66.6% to the total mutations  
228 (Supplemental Fig 7b). For C>T mutations, we expected them to be a mixture of FFPE artefacts and  
229 real biological mutations, because of the relative preponderance (~35%) of C>T mutations in PCAWG  
230 CRCs. T>C mutations accounted for 41.2% and 39.8% in our unrepaired and repaired FFPEs, but only  
231 ~16% in PCAWG CRCs (Supplemental Fig 7c). Similarly, large proportions of T>C mutations were  
232 also detected in FFPE samples in study 1 (Supplemental Fig 1). As noted above, these presumably  
233 artefactual T>C mutations did not show consistent patterns (Supplemental Fig 3c). Therefore, we  
234 excluded T>C mutations from further study.

235

236 Since matched FF was not available to provide the ground truth mutational signature, we were inspired  
237 by results found in study 2 [8], where both repaired and unrepaired FFPE samples contained the majority  
238 of the variants found in the matched FF sample. Thus, we used concordant mutations with more strict  
239 filtering (variant supporting reads  $\geq 5$  in both FFPEs) as an approximation for the true biological  
240 mutation profile of the tumour: this yielded a total of 1040 filtered concordant mutations (Supplemental  
241 Fig 7a and 7b), and 656 of them remained after excluding T>C mutations (top panel of Fig 3a).

242

243 To obtain more general knowledge about the biological mutation profiles of CRCs, we performed  
244 hierarchical clustering on the 60 PCAWG CRC samples and discovered the samples share highly

245 homologous mutational profiles within each subtype, namely MSS, MSI and POLE (Supplemental Fig  
246 8a). The averaged sample-pair cosine similarity is 0.90 for MSS-CRCs, 0.92 for MSI-CRCs and 0.96  
247 for POLE-CRC, but profiles between subtypes are significantly different (Supplemental Fig 9a). To  
248 identify the most “conserved” mutation patterns within each subtype, we performed a similar analysis  
249 on six mutation types separately, which showed C>A and C>T mutations have the strongest power in  
250 classifying CRC subtypes (Supplemental Fig 8b and 9b). Therefore, we compared the concordant C>A  
251 mutations observed in our case to the PCAWG CRCs and identified that our sample was a MSS-CRC  
252 (Fig 3b).

253

254 We next applied FFPEsig on the observed mutation counts from the two FFPE samples and valuated  
255 the corrected profiles (Fig 3a and Supplemental Fig 10) by comparing them to concordant mutation  
256 catalogue as well as all PCAWG MSS-CRC samples, under the assumption that after removing artefacts  
257 the mutational profile of our samples should show higher similarity to both ‘positive controls’. For  
258 unrepaired FFPE CRC, the accuracy improved from 0.906 before correction to 0.945 after correction  
259 to concordant mutations (Fig 3c). When compared to MSS-CRCs, the correction led to a significant  
260 increase in cosine similarity from 0.841 to 0.918 (Fig 3d). However, correction on repaired FFPE CRC  
261 generated the opposite results (Fig 3c and 3d). We validated our observations using simulated FFPE  
262 MSS-CRCs and confirmed that the correction was only beneficial for unrepaired not repaired FFPEs  
263 (Fig 3e). This was because the biological MSS-CRC profiles are highly similar to the repaired FFPE  
264 signature (0.98 on C>T channels) and so our correction method could not distinguish true mutations  
265 from artefacts.

266

267 We further investigated how our corrected profile from unrepaired FFPE could contribute to CRC  
268 subtyping. Application of MSIsensor [26] detected 8.3% of microsatellite sites with somatic changes in  
269 the unrepaired FFPE sample, but only 0.23% from the repaired FFPE. 8.3% exceeds the 3.5% threshold  
270 to call MSI [26], and so application of MSIsensor to an unrepaired FFPE sample could lead to miscalling  
271 of MSI status. We therefore attempted to classify the sample using the ‘conserved’ mutation patterns  
272 within CRC subtypes (described above). The unrepaired FFPE sample was equally similar to both using

273 observed C>A and C>T trinucleotide mutational counts together or only C>T mutations (Supplemental  
274 Fig 11a and 11b). However, following correction using FFPEsig, we could clearly distinguish that the  
275 sample was MSS. In addition, we found that the C>A mutation pattern itself could also classify our  
276 sample (Supplemental Fig 11c). As FFPEsig mostly in C>T channels, C>A patterns were almost the  
277 same with or without correction (0.99).

## 278 Potential of using 80-channel signatures for refitting analysis in FFPE 279 samples

280 T>C were common in some but not all FFPE samples in our dataset, and perhaps resulted in differences  
281 in sequencing library preparation methodology between studies. To attempt to control for this  
282 unexplained variation, here we examined the impact of removing all T>C variants during signature  
283 refitting analysis. We compared the attributed mutation count (or activity) of each signature by  
284 supplying our refitting model with 80-channel (80c; T>C removed) and 96-channel (96c) signatures on  
285 PCAWG mutational catalogues (see Methods & Materials; Supplemental Fig 12). The  $\log_{10}$  signature  
286 activity ratio of 80c to 96c was used to estimate how consistent both results were, and we termed this  
287 value as an inconsistency rate. The bigger the absolute inconsistency rate is, the more different the  
288 attributions are.

289

290 We refitted 10,312 mutational signature activities for 29 active signatures from 2,726 PCAWG genomes  
291 (Fig 4a), and an additional 54 genomes were excluded from original PCAWG dataset due to either low  
292 reconstruction accuracy ( $<0.85$ ;  $n=35$ ) by 96c signatures or too small of a sample size ( $<10$  cases per  
293 signature per cancer type;  $n=19$ ). The mean inconsistency rate among 10312 refits was 0.013 (95% CI:  
294 0.0076, 0.1783) (middle panel of Fig 4a). We considered signatures with inconsistency rate between -  
295 0.30 to 0.18, equivalent to actual activity ratio from 0.5 to 1.5, as having well-refitted results. Of the  
296 originally inferred 10312 signature activities that used 96c data, 8938 (86.7%) were well-refitted when  
297 only 80c data was used. 24 of 29 signatures were considered well-refitted.

298

299 For the five signatures that were poorly refitted using 80c, four of them had high T>C mutation rates,  
300 namely SBS7d, 12, 16 and 17a (left panel of Fig 4a). The inconsistency rate was significantly correlated  
301 with T>C mutation rate of signatures (Spearman's  $\rho=0.54$ ,  $p<e-10$ ). We grouped the refitted data  
302 based on cancer types (right panel of Fig 4a) and discovered the majority of the above five signatures  
303 with inconsistent refits were each only reported in one cancer type, except for SBS17a which was  
304 present in four cancer types. SBS6 also had a high inconsistency rate and was mostly detected in non-  
305 Hodgkin lymphoma (lymph-BNHL), likely due to the higher similarity shared with SBS1 (0.77). Taken  
306 together, removing T>C mutations had a very minor impact on refitting analysis for the majority of the  
307 cases (86.7%), apart from the minority of cases with a high T>C mutation rate.

308

309 In addition, SBS5 and SBS40 showed noticeable differences between 96c and 80c fits in several cancer  
310 types. With the knowledge of these two 'flat' signatures are highly similar (0.83 using 96c; 0.86 using  
311 80c), the model could have problems distinguishing them using either 80c or 96c. Thus, we suspected  
312 that the inferred signature activity of SBS5 or SBS40 could vary individually within a sample, but the  
313 sum of the activity of the two signatures would be fairly constant. We tested our hypothesis on samples  
314 with both signatures active (Fig4b). As expected, the sum of activities converged well with the mean  
315 inconsistency rate of 0.02 (95% CI: 0.019, 0.023), but individual attribution for SBS5 was higher by  
316 80c (mean inconsistent rate of 0.15; 95%CI: 0.14, 0.16) and lower for SBS40 (mean inconsistency rate  
317 of -0.19; 95%CI: -0.21, -0.16), and the two individual attributions were negatively correlated  
318 (Spearman's  $\rho=-0.69$ ,  $p=6.22e-164$ ).

319

320 Finally, we examined signatures where removal of the T>C mutations was most likely to be detrimental  
321 for signature identification. We compared all possible signature pairs among 65 COSMIC V3 SBS  
322 signatures (Supplemental Fig 13). As expected, the overall similarities between any two signatures  
323 tended to increase, especially for the originally dissimilar ( $<0.2$ ) signatures pairs (Supplemental Fig 13a  
324 and 13b). Five signature-pairs became highly similar ( $>0.8$ ) using 80c. Three out of them are reported  
325 to be biological/non-artificial mutation processes, namely SBS3-SBS5, SBS40-SBS12 and SBS40-  
326 SBS16 (Supplemental Fig 13c). However, two signature-pairs became even more distinguishable using

327 80c (Supplemental Fig 13c). Therefore, we concluded that reducing to 80 channel signatures by removal  
328 of T>C channels tended to have a minor effect on signature identification.

## 329 **Discussion**

330 In this study, we derived genome-wide mutational signatures that result from formalin exposure in FFPE  
331 biospecimens and designed an algorithm, FFPEsig, to detect and remove artefactual-FFPE mutations  
332 from measured mutational profiles. The accuracy of FFPEsig was demonstrated on synthetic FFPE  
333 samples. Accuracy was generally very high. We note poorer performance occurred when (a) biological  
334 mutation loads were low and (b) for samples where the true mutational profile closely resembled the  
335 FFPE-artefact signature - we note these circumstances are straightforward to identify in practice and so  
336 it is clear when FFPEsig can be safely applied. We note that the statistical machinery within FFPEsig  
337 is generalisable, and could be repurposed to correct for “mutational noise” from any source.

338

339 The repaired FFPE signature discovered in this study is highly similar to the aging signature SBS1 (Fig  
340 1e). Both formalin-mutagenesis and the process leading to biological SBS1 are caused by deamination  
341 of 5-methylcytosine (5mC) (SBS1 is due to spontaneous deamination *in vivo* whereas the FFPE  
342 signature is caused by chemical deamination *in vitro* [5,24]). Unfortunately, this high similarity  
343 precludes the study of the activity of the aging signature in repaired FFPEs, which is active in all tumour  
344 genomes [24]. Similarly, the signature associated with unrepaired FFPE samples is highly similar to  
345 SBS30 and therefore would also distort the study of SBS30 in FFPE samples (Fig 1d). However,  
346 biological SBS30 occurs more rarely: it is caused by loss-of-function in glycosylases in BER due to  
347 biallelic inactivation mutations in *NTHL1*, and patients carrying this variant are diagnosed as *NTHL1*  
348 tumour syndrome with an increased lifetime risk for CRC, breast cancer, and colorectal polyposis  
349 [22,23,27]. More generally, our results show that there is not necessarily a direct 1-to-1 mapping  
350 relationship from mutational process to a unique signature profile (as also questioned in [28]) as distinct  
351 mutational sources can cause similar profiles. Nevertheless, our findings speak to the utility of  
352 constructing a common carcinogen signature database [28,29].

353

354 The accumulation speed of C>T artefacts in unrepaired FFPEs suggests that UDG “repair treatment”  
355 rectified DNA deamination damages to a large extent (Fig 1a). Therefore, fixation time is an important  
356 pre-analytical factor of determining the burden of FFPE-artefact mutations, which could influence the  
357 downstream signature analysis. Further, large numbers of putatively artefactual T>C mutations can be  
358 present in FFPE samples and biological interpretation of these must be performed with extreme care.  
359 Indeed, Marchetti *et al.* identified 22 out of 24 (92%) previously reported ‘novel’ mutations in *EGFR*  
360 to be FFPE artefacts, and those 22 mutations were either C>T or T>C [30]. So far, we have not found  
361 evidence showing which chemical agent in formalin could cause deamination of adenine, as this would  
362 result in hypoxanthine residues and further preferentially pair with cytosine to generate A:T>G:C  
363 artefacts [31]. However, regardless of the unclear mutagenic mechanism, once the wrong residuals were  
364 generated on the DNA, multiple PCR amplifications of very small amounts of DNA from paraffin-  
365 embedded tissues would make the artefacts easily observed from the data [30].

## 366 **Conclusion**

367 In conclusion, here we identified two mutational signatures, linked to repaired and unrepaired FFPE,  
368 which are highly similar to COSMIC signatures SBS1 and SBS30, respectively. We further developed  
369 FFPEsig software to accurately remove FFPE-induced mutational artefacts and demonstrated efficacy  
370 *in silico* and in new samples. Careful application of our approach will enable the robust study of  
371 mutational signatures in the enormous FFPE archives that exist around the world.

## 372 **Methods & Materials**

### 373 **Targeted sequencing data**

374 We used targeted sequencing data from two previous publications [8,11]. Prentice *et al.* has collected  
375 three groups of samples from CRC patients, namely fixation, baseline and blockage, to examine the  
376 impact of three factors on somatic mutation detection in clinical FFPE samples [11]. The three factors

377 were formalin fixation time (fixation; n=3), DNA extraction kits (baseline; n=20) and storage time  
378 (blockage; n=9). Samples collected in the fixation group were fixed in formalin for 2, 15, 24 and 48  
379 hours for both repaired and unrepaired FFPEs, and paired FF samples were also available. To validate  
380 if true somatic mutations are detectable in FFPE samples, Prentice *et al.* applied several filters on the  
381 mutation calling results, which could have filtered FFPE artefacts out. Thus, for our purpose of learning  
382 FFPE noise signatures, we have included all data but those passed the somatic filters.

383

384 To study possible batch effects, we also included targeted panel sequencing data from study 2 in our  
385 analysis [8]. There were four normal breast tissues collected in the study. For each of them, triplicate  
386 samples were collected, fresh frozen, repaired and unrepaired FFPE. We summarised the general sample  
387 information here and more details can be found in original studies.

## 388 Mutational opportunities for targeted sequencing data

389 The FASTA sequences for targeted regions for study1 were downloaded  
390 from <https://www.ncbi.nlm.nih.gov/sites/batchentrez> and for study2 were from  
391 <https://m.ensembl.org/info/website/tutorials/grch37.html>. To obtain mutational opportunities, we  
392 calculated 96-channel mutation context frequency from the second to the last second nucleotide within  
393 each sequence. We assumed one genomic location was the mutated loci and added 1 count to all mutable  
394 channels with the sequence contexts of this loci. We applied this calculation over all sequences and  
395 normalised the 96-trinucleotide counts to sum up to 1 as the mutational opportunity vector for the given  
396 targeted regions (Supplemental Fig 4a and 4b). The whole genome mutation opportunity was taken  
397 from [32] (Supplemental Fig 4c).

## 398 Discovery of FFPE signatures

399 To derive FFPE signatures, we pre-processed the whole mutations list to exclude non-FFPE artefacts  
400 as much as possible. In both studies, mutations were excluded if they met any of the following criteria,  
401 1) being detected in a matched FF sample; 2) being detected in matched normal samples; 3) with >0.9  
402 posterior probability of being somatic mutations. The remaining mutations were used to generate 96-



403 channel mutation counts by SigProfilerMatrixGenerator [33]. We normalised mutation counts from the  
404 two studies separately using their corresponding mutational opportunities. Specifically, the original  
405 mutation counts were divided by the mutational opportunity of the targeted regions and multiplied by  
406 mutational opportunity of whole genome context. The final normalised mutational probabilities were  
407 merged from two studies and non-T>C channels were further taken to derive FFPE signatures (Fig 1b),  
408 whereas T>C channels were analysed separately (Supplemental Fig3c).

409

410 To derive FFPE signatures, we first applied t-distributed Stochastic Neighbour Embedding (t-SNE) for  
411 dimensionality reduction for the cosine distance matrix of the merged 80-channel mutational  
412 probabilities. Based on the two principal components provided by t-SNE, we defined well representative  
413 samples for two repaired and unrepaired FFPE clusters using data point density estimated by gaussian  
414 kernel (from `scipy.stats`) (Supplemental Fig 5a). The high-density samples ( $>0.018$ ) were used to  
415 generate one set of FFPE signature candidates. With repeating the above procedure for 100 times, we  
416 took the averaged values of each channel as the final FFPE signatures (Supplemental Fig 5b and 5c).

## 417 Algorithm/FFPEsig for FFPE artefacts correction

418 We denote the observed mutation counts from the FFPE sample by  $V$ , which was considered as a linear  
419 combination of artefact signature  $W_1$  and biological mutation frequency  $W_2$  with their corresponding  
420 attributions/activities  $H_1$  and  $H_2$ . Thus, we have:

$$421 \quad V \approx \sum_{i \in (1,2)} W_i * H_i$$

422 In this model,  $V$  and  $W_1$  were known and the task was to infer  $H = [H_1, H_2]^T$  and  $W_2$ . Here, we utilised  
423 generalized Kullback-Leibler (KL) divergence between reconstructed  $\hat{V} = \sum_{i \in (1,2)} W_i * H_i$  and the  
424 observed profile  $V$  as the cost function and applied Lee and Seung's multiplicative update rules [34] to  
425 minimize the cost function.

426

427 The whole process of one iteration started with randomly generated initial values for  $W_2$ . We then  
428 updated  $H$  using the multiplicative rules [34] followed by  $W$ , in which only  $W_2$  was updated. From the  
429 updated  $W$  and  $H$ , we got  $\hat{V}$ . The generalised KL divergence, between  $V$  and  $\hat{V}$  was computed and  
430 saved. This update process iterated over 200 steps by default until it met our termination criteria defined  
431 here. We calculated the convergence ratio using the average KL divergence from the last batch of 20  
432 iterations divided by the second last batch of 20 iterations. The algorithm would terminate if the  
433 convergence ratio reaches 0.95. The maximum iteration by default was up to 3000. The above one  
434 whole process provided inferred  $W_2$  and  $H$  as one candidate solution. We collected 100 candidate  
435 solutions using different random seeds and averaged them as our final solution for all samples analysed  
436 for FFPE noise correction in this study.

## 437 Simulation of FFPE samples

438 To simulated FFPE samples for algorithm performance validation, we added different amounts of FFPE  
439 artificial mutations with Poisson noise to biological mutation catalogues of 2,780 cancer genomes  
440 provided in Pan-Cancer Analysis of Whole Genomes (PCAWG) project by International Cancer  
441 Genome Consortium (ICGC) [19,25]. The data is available to download from  
442 <https://www.synapse.org/#!/Synapse:syn11801889>. Additionally, subtype labels of PCAWG CRC  
443 samples used in the case study were also downloaded from the same site.

## 444 DNA extraction and genome sequence of FFPE CRCs

445 The male patient with ulcerative colitis was diagnosed with cancer in the transverse colon at age 48 in  
446 St. Mark's Hospital, London, United Kingdom. Formalin-fixed paraffin-embedded (FFPE) sections of  
447 10 $\mu$ m thickness were deparaffinized, rehydrated and lightly stained with methyl green. The annotated  
448 H&E was used as a guide for epithelial enrichment through targeted needle scraping of slides (for  
449 estimated epithelial cellularity >50%). To collect matched normal tissue, targeted scraping of serosal  
450 tissue from FFPE blocks was taken from a small intestinal segment distal to the cancer. DNA was  
451 extracted using a modified protocol of the High Pure FFPE DNA Isolation Kit (Roche Life Science,

452 Penzburg, Germany). The normal tissue DNA sample and one tumour DNA sample were repaired using  
453 the NEBNext FFPE DNA Repair Mix (New England Biolabs, Inc) following the manufacturer's  
454 recommendations. The remaining tumour DNA was left unrepaired. DNA libraries were prepared using  
455 the NEBNext Ultra II DNA Library Prep Kit for Illumina (New England BioLabs, Ipswich,  
456 Massachusetts, USA), followed by equimolar pooling strategy. Finally, all DNA libraries were  
457 sequenced on NovaSeq S2 for 50bp paired end reads.

## 458 Somatic variants calling in WGS FFPE CRCs

459 The paired-end reads underwent initial quality control with FastQC [35] followed by default adaptor  
460 trimming with Skewer [36] and were subsequently aligned to GRCh38 reference genome with BWA-  
461 MEM [37]. Aligned reads were sorted by genome coordinate (SortSam, Picard) and duplicate reads  
462 were flagged with GATK's MarkDuplicates [38]. The two FFPE tumour samples were called against  
463 the matched normal separately using the Mutect2 somatic variant caller from GATK [38]. Variants were  
464 marked with filters by FilterMutectCalls. Variants were kept if they were PASS by Mutect2, aligned to  
465 a canonical chromosome, had a total allelic depth of greater or equal to 10 in both the tumour and normal  
466 sample and had 3 or more reads supporting the alternative allele in the tumour sample. The filtered  
467 variants from two FFPE tumour samples were merged into a single VCF file using VCFtools [39].

468

469 We used Platypus on the merged VCF file as the candidate somatic variant list and integrated local  
470 alignment with multi-sample variant calling to assess the evidence for these variants across all samples  
471 [40]. The resulting VCF file was further filtered to only contain variants 1) if the FILTER flag was  
472 PASS or other acceptable filters (alleleBias, Q20, QD, SC, HapScore); 2) the variant was not a known  
473 germline variant; 3) a genotype was called for all samples; the genotype phred score was 10 or more in  
474 all samples; 4) the normal sample had no reads containing the variant and at least 3 or more reads  
475 supported the variant in a tumour sample. Variants present in two FFPE samples with 5 or more  
476 supporting reads were classified as concordant mutations.

## 477 Signature refitting analysis

478 To validate if signature refitting analysis could use 80-channel spectra without T>C, we dropped T>C  
479 mutation channels of COSMIC SBS signatures and renormalised them to sum up to 1. The original  
480 activities inferred using 96-channel signatures for PCAWG cohorts were obtained from  
481 [https://dcc.icgc.org/releases/PCAWG/mutational\\_signatures/](https://dcc.icgc.org/releases/PCAWG/mutational_signatures/) [19,25]. The active signatures for each  
482 sample were selected if the original activities >0. We next refitted 80c and 96c active signatures to the  
483 mutational catalogues with and without T>C mutations accordingly using our locally implemented  
484 refitting algorithm to exclude possible bias introduced by different tools. The refitting algorithm used  
485 the same multiplicative update rules and termination criteria from FFPEsig, but was different in two  
486 aspects, 1) the number of signatures was flexible which depended on the active signatures in each  
487 sample; 2) only *H* was updated in each iteration. The inferred activities for 80c-signatures were then  
488 rescaled by dividing total mutation frequencies of non-T>C mutation channels of 96c spectra. The  
489 rescaled 80c attributions were used to compare to those inferred from 96c signatures.

## 490 Data and code access

491 Submission of BAM files of sequenced data to EGA is in progress. The VCF files generated in our  
492 study are available from the corresponding authors, upon reasonable request. FFPEsig is implemented  
493 in python which is available to download from <https://github.com/QingliGuo/FFPEsig> , as well as  
494 analysis code and data used in this study.

## 495 Abbreviations

496 FFPE: Formalin fixation and paraffin embedding  
497 FF: fresh frozen  
498 UDG: uracil DNA glycosylase  
499 PCAWG: Pan-Cancer Analysis of Whole Genomes  
500 COSMIC: The Catalogue of Somatic Mutations in Cancer  
501 SBS: single base substitutions

502 CRC: colorectal cancer  
503 MSI: microsatellite instability  
504 POLE: proofreading subunit of polymerase epsilon  
505 MSS: microsatellite stability  
506 EGFR: epidermal growth factor receptor  
507 PCR: polymerase chain reaction  
508 BAM: Binary Alignment Map file  
509 t-SNE: t-distributed Stochastic Neighbour Embedding

## 510 **Acknowledgements**

511 We thank Virinder Singh Reen and Dr. Ignacio Vázquez-García for helpful comments on the  
512 manuscript. We thank the team at St Mark's Hospital London, UK, Andrea Sottoriva, Inma Spiteri,  
513 Ann-Marie Baker, Salpie Nowinski, Jacob Househam and Chris Kimberley for support with FFPE  
514 sample provision and analysis. This research utilised Queen Mary's Apocrita HPC facility, supported  
515 by QMUL Research-IT. <http://doi.org/10.5281/zenodo.438045>. We also thank Prof. Amy C. Degnim,  
516 Dr. Chen Wang and the Mayo Clinic for help with data sharing.

## 517 **Author's contributions**

518 Q.G, T.A.G and V.M. conceived the study. Q.G. designed, carried out the data analysis, designed and  
519 implemented the algorithm and interpreted the initial results. V.M. designed the algorithm and  
520 supervised data analysis. Q.G and E.L. carried out the WGS FFPE case study. I.AB provided FFPE  
521 samples and performed genome sequencing. K.C performed mutation calling on the FFPE case. Q.G.,  
522 V.M., T.A.G. and E.L. participated and contributed in results discussion and interpretation. Q.G. and  
523 T.A.G wrote the manuscript. E.L. and V.M edited the manuscript. V.M. and T.A.G supervised the  
524 project. All authors read and approved the final manuscript.

## 525 **Funding**

526 T.A.G acknowledges funding from Cancer Research UK (A19771 and A16581) and the Barts Charity  
527 (472-2300). E.L. is also supported by funding from Cancer Research UK (A19771).

## 528 **Ethics approval and consent to participate**

529 The archival colorectal cancer studied was collected and analysed in accordance with ethical approval  
530 from the UK Research Ethics Committee (REC: 18/LO/2051 IRAS:249008 - Fulham committee). The  
531 sample was anonymised to the researchers.

## 532 **Competing interests**

533 All authors named in this paper declare no conflicts of interest.

## **References**

1. Williams C, Pontén F, Moberg C, Söderkvist P, Uhlén M, Pontén J, et al. A high frequency of sequence alterations is due to formalin fixation of archival specimens. *Am J Pathol.* 1999;155:1467–71.
2. Mathieson W, Thomas G. Using FFPE Tissue in Genomic Analyses: Advantages, Disadvantages and the Role of Biospecimen Science. *Curr Pathobiol Rep. Current Pathobiology Reports*; 2019;7:35–40.
3. Spencer DH, Sehn JK, Abel HJ, Watson MA, Pfeifer JD, Duncavage EJ. Comparison of clinical targeted next-generation sequence data from formalin-fixed and fresh-frozen tissue specimens. *J Mol Diagn. American Society for Investigative Pathology*; 2013;15:623–33.
4. Wong SQ, Li J, Tan AYC, Vedururu R, Pang JMB, Do H, et al. Sequence artefacts in a prospective series of formalin-fixed tumours tested for mutations in hotspot regions by massively parallel sequencing. *BMC Med Genomics [Internet]*. 2014;7. Available from: <http://dx.doi.org/10.1186/1755-8794-7-23>
5. Do H, Dobrovic A. Sequence artifacts in DNA from formalin-fixed tissues: Causes and strategies for minimization. *Clin Chem.* 2015;61:64–71.
6. Kawanishi M, Matsuda T, Yagi T. Genotoxicity of formaldehyde: molecular basis of DNA damage and mutation. *Front Environ Sci Eng China.* 2014;2:36.
7. Kennedy-Darling J, Smith LM. Measuring the formaldehyde protein-DNA cross-link reversal rate. *Anal Chem.* 2014;86:5678–81.
8. Bhagwate AV, Liu Y, Winham SJ, McDonough SJ, Stallings-Mann ML, Heinzen EP, et al. Bioinformatics and DNA-extraction strategies to reliably detect genetic variants from FFPE breast tissue samples. *BMC Genomics. BMC Genomics*; 2019;20:1–10.

9. Arbeithuber B, Makova KD, Tiemann-Boege I. Artfactual mutations resulting from DNA lesions limit detection levels in ultrasensitive sequencing applications. *DNA Res.* 2016;23:547–59.
10. Chen G, Mosier S, Gocke CD, Lin MT, Eshleman JR. Cytosine Deamination Is a Major Cause of Baseline Noise in Next-Generation Sequencing. *Mol Diagn Ther.* 2014;18:587–93.
11. Prentice LM, Miller RR, Knaggs J, Mazloomian A, Hernandez RA, Franchini P, et al. Formalin fixation increases deamination mutation signature but should not lead to false positive mutations in clinical practice. *PLoS One.* 2018;13:e0196434.
12. Nik-Zainal S, Alexandrov LB, Wedge DC, Van Loo P, Greenman CD, Raine K, et al. Mutational processes molding the genomes of 21 breast cancers. *Cell.* 2012;149:979–93.
13. Alexandrov LB, Nik-Zainal S, Wedge DC, Aparicio SAJR, Behjati S, Biankin AV, et al. Signatures of mutational processes in human cancer. *Nature.* 2013;500:415–21.
14. Pich O, Muiños F, Lolkema MP, Steeghs N, Gonzalez-Perez A, Lopez-Bigas N. The mutational footprints of cancer therapies. *Nat Genet.* Springer US; 2019;51:1732–40.
15. Ma J, Setton J, Lee NY, Riaz N, Powell SN. The therapeutic significance of mutational signatures from DNA repair deficiency in cancer. *Nat Commun.* Springer US; 2018;9:1–12.
16. Gulhan DC, Lee JJK, Melloni GEM, Cortés-Ciriano I, Park PJ. Detecting the mutational signature of homologous recombination deficiency in clinical samples. *Nat Genet.* Springer US; 2019;51:912–9.
17. Van Hoeck A, Tjoonk NH, Van Boxtel R, Cuppen E. Portrait of a cancer: Mutational signature analyses for cancer diagnostics. *BMC Cancer.* BMC Cancer; 2019;19:1–14.
18. Donoghue MTA, Schram AM, Hyman DM, Taylor BS. Discovery through clinical sequencing in oncology. *Nature Cancer.* Nature Publishing Group; 2020;1:774–83.
19. Alexandrov LB, Kim J, Haradhvala NJ, Huang MN, Tian Ng AW, Wu Y, et al. The repertoire of mutational signatures in human cancer. *Nature.* 2020;578:94–101.
20. Maaten L, Hinton G. Visualizing data using t-SNE. *J Mach Learn Res [Internet].* jmlr.org; 2008; Available from: <http://www.jmlr.org/papers/v9/vandermaaten08a.html>
21. Kim S, Park C, Ji Y, Kim DG, Bae H, van Vrancken M, et al. Deamination Effects in Formalin-Fixed, Paraffin-Embedded Tissue Samples in the Era of Precision Medicine. *J Mol Diagn.* American Society for Investigative Pathology and the Association for Molecular Pathology; 2017;19:137–46.
22. Drost J, Van Boxtel R, Blokzijl F, Mizutani T, Sasaki N, Sasselli V, et al. Use of CRISPR-modified human stem cell organoids to study the origin of mutational signatures in cancer. *Science.* 2017;358:234–8.
23. Grolleman JE, de Voer RM, Elsayed FA, Nielsen M, Weren RDA, Palles C, et al. Mutational Signature Analysis Reveals NTHL1 Deficiency to Cause a Multi-tumor Phenotype. *Cancer Cell.* 2019;35:256–66.e5.
24. Alexandrov LB, Jones PH, Wedge DC, Sale JE, Campbell PJ, Nik-Zainal S, et al. Clock-like mutational processes in human somatic cells. *Nat Genet.* Nature Publishing Group; 2015;47:1402–7.
25. ICGC/TCGA Pan-Cancer Analysis of Whole Genomes Consortium. Pan-cancer analysis of whole genomes. *Nature.* 2020;578:82–93.
26. Niu B, Ye K, Zhang Q, Lu C, Xie M, McLellan MD, et al. BIOINFORMATICS APPLICATIONS NOTE Sequence analysis MSIsensor : microsatellite instability detection using paired tumor-normal

sequence data. 2014;30:1015–6.

27. Kuiper RP, Nielsen M, De Voer RM, Hoogerbrugge N. NTHL1 Tumor Syndrome. In: Adam MP, Ardinger HH, Pagon RA, Wallace SE, Bean LJH, Mirzaa G, et al., editors. GeneReviews®. Seattle (WA): University of Washington, Seattle; 2020.

28. Koh G, Zou X, Nik-Zainal S. Mutational signatures: Experimental design and analytical framework. *Genome Biol. Genome Biology*; 2020;21:1–13.

29. Kucab JE, Zou X, Morganella S, Joel M, Nanda AS, Nagy E, et al. A Compendium of Mutational Signatures of Environmental Agents. *Cell. Elsevier Inc.*; 2019;177:821–36.e16.

30. Marchetti A, Felicioni L, Buttitta F. Assessing EGFR mutations. *N. Engl. J. Med.* 2006. p. 526–8; author reply 526–8.

31. Karran P, Lindahl T. Hypoxanthine in deoxyribonucleic acid: generation by heat-induced hydrolysis of adenine residues and release in free form by a deoxyribonucleic acid glycosylase from calf thymus. *Biochemistry.* 1980;19:6005–11.

32. Fischer A, Illingworth CJR, Campbell PJ, Mustonen V. EMu: Probabilistic inference of mutational processes and their localization in the cancer genome. *Genome Biol.* 2013;14:R39.

33. Bergstrom EN, Huang MN, Mahto U, Barnes M, Stratton MR, Rozen SG, et al. SigProfilerMatrixGenerator: A tool for visualizing and exploring patterns of small mutational events. *BMC Genomics.* 2019;20:685.

34. Lee DD, Sebastian Seung H. Learning the parts of objects by non-negative matrix factorization. *Nature.* 1999;401:788–91.

35. Andrews S, Krueger F, Segonds-Pichon A, Biggins L, Krueger C, Wingett S. FastQC: a quality control tool for high throughput sequence data [Internet]. 2010. Available from: <http://www.bioinformatics.babraham.ac.uk/projects/fastqc>

36. Jiang H, Lei R, Ding S-W, Zhu S. Skewer: a fast and accurate adapter trimmer for next-generation sequencing paired-end reads. *BMC Bioinformatics.* 2014;15:182.

37. Li H, Durbin R. Fast and accurate short read alignment with Burrows–Wheeler transform. *Bioinformatics.* Oxford Academic; 2009;25:1754–60.

38. Van der Auwera GA, Carneiro MO, Hartl C, Poplin R, Del Angel G, Levy-Moonshine A, et al. From FastQ data to high confidence variant calls: the Genome Analysis Toolkit best practices pipeline. *Curr Protoc Bioinformatics.* 2013;43:11.10.1–11.10.33.

39. Danecek P, Auton A, Abecasis G, Albers CA, Banks E, DePristo MA, et al. The variant call format and VCFtools. *Bioinformatics.* 2011;27:2156–8.

40. Rimmer A, Phan H, Mathieson I, Iqbal Z, Twigg SRF, WGS500 Consortium, et al. Integrating mapping-, assembly- and haplotype-based approaches for calling variants in clinical sequencing applications. *Nat Genet.* 2014;46:912–8.



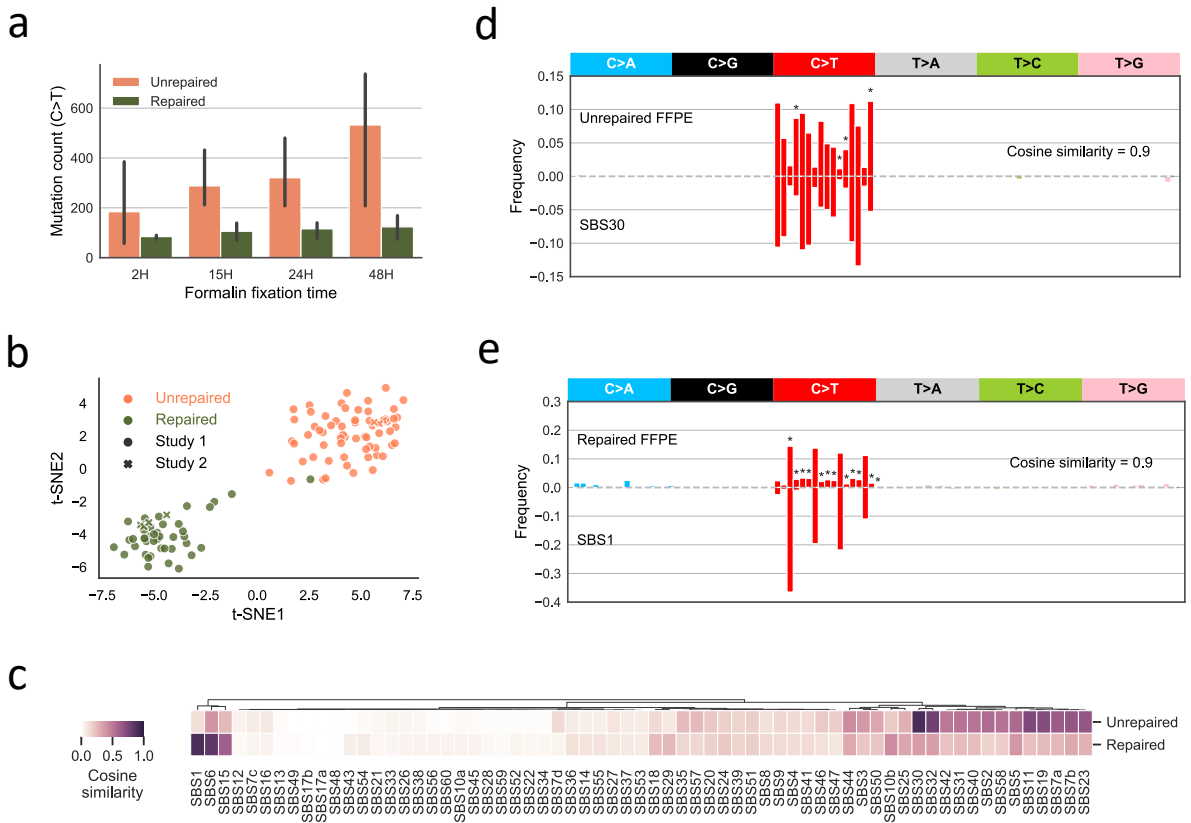

**Fig1. FFPE artefact signatures.** (a) C>T mutation count in FFPE samples increases with formalin fixation time. We used FFPE-only C>T mutations, referring to C>T mutations that are only discovered in FFPE samples not in matched FF. The error bar shows standard deviation for measurements made on three individuals. (b) Cluster of n=110 normalised FFPE mutational profiles from two different studies [11,8]. The cluster is represented by t-SNE on cosine metric of normalised 80-channel (without T>C) FFPE-only mutational profiles (see Methods & Materials). Each FFPE sample is classified as unrepaired (with UDG treatment; pink dots) or repaired (without UDG; green dots). The two studies are marked using circle or cross shape. (c) Comparison of FFPE signatures to COSMIC V3 SBS signatures. (d) Unrepaired FFPE signature is highly similar to SBS30. C>T mutation channels with fold change over 2 are marked with asterisk. (e) Repaired FFPE signature is highly similar to SBS1.

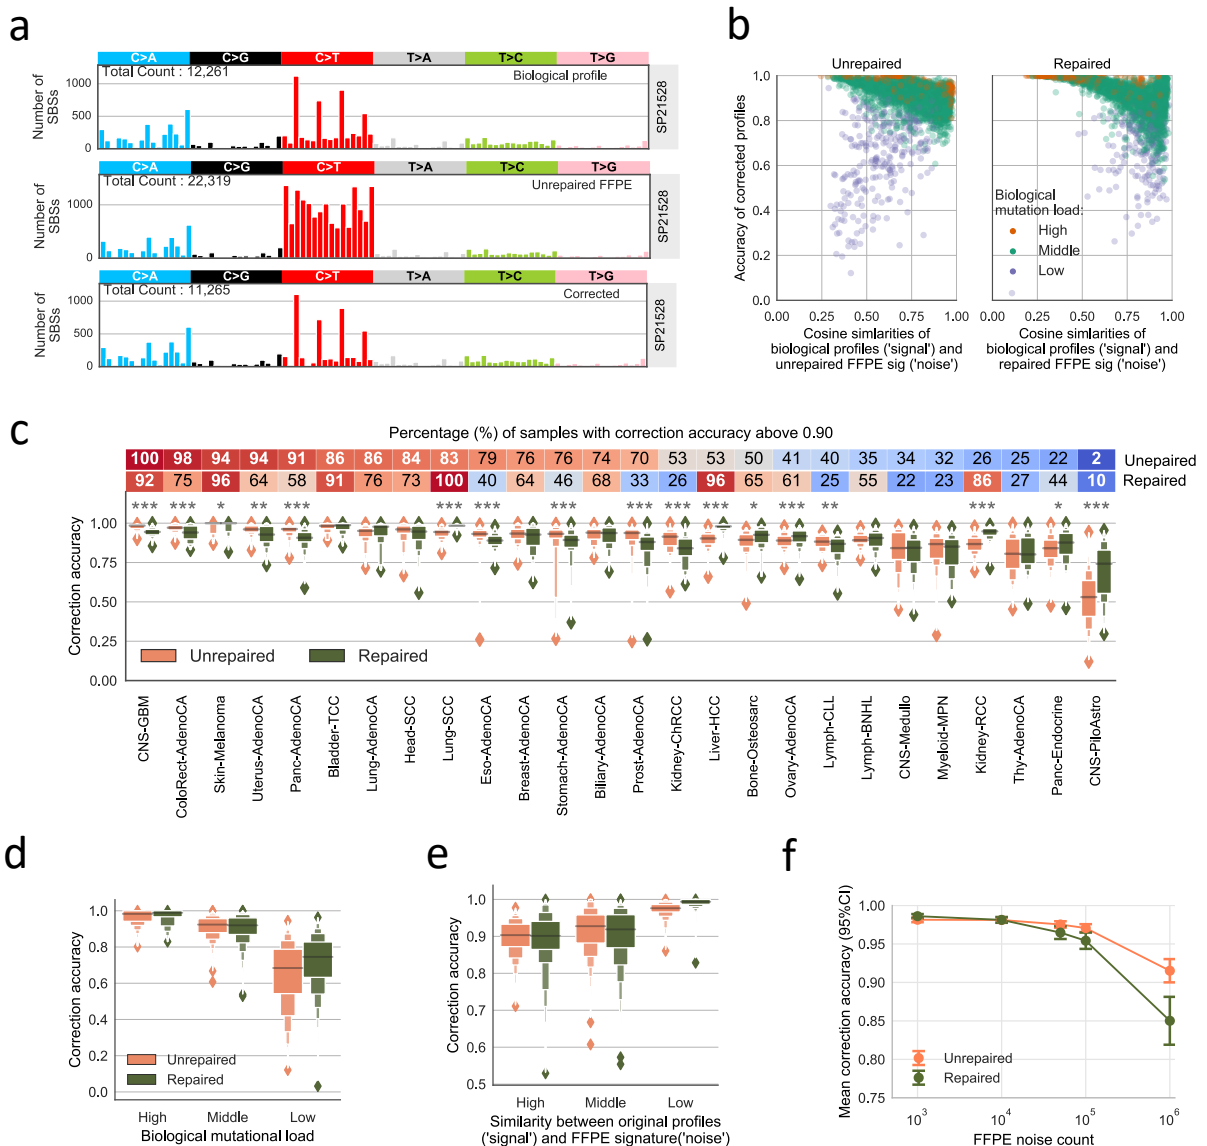

**Fig2. Correction of FFPE artefacts in synthetic FFPE samples.** We added FFPE noise signatures to biological mutational profiles in PCAWG dataset [20] to simulate FFPE mutational profiles. (a) Artefacts correction result of one colorectal cancer (SP21528). From top to bottom, the three panels are original/biological mutational profile, simulated FFPE mutational profile (unrepaired) and the corrected somatic mutation catalogue. (b) Correction accuracy for all simulated data. The left panel shows results for unpaired FFPEs and the right panel is for repaired FFPEs. The x-axis shows cosine similarities between original profiles ('signal') and the FFPE signatures ('noise'). We also group the data into three categories according to the biological mutation load, namely high (top 10%, orange dots), low (bottom 10%, purple dots) and middle (the remaining ones, green dots). (c) Correction accuracy for different cancer types. Cancer types with at least 20 samples are used here. The difference between unrepaired and repaired FFPE correction accuracy is shown above each box-pair using two-sided Mann-Whitney  $U$  test.  $P$  value  $\leq 0.001$  (\*\*\*) ;  $0.001 < p$  value  $\leq 0.01$  (\*\*);  $0.01 < p$  value  $\leq 0.05$  (\*);  $p$  value  $> 0.05$  (none). The percentages of well-corrected samples (accuracy  $> 0.9$ ) are annotated in the top colour bars. (d) Correction accuracy positively correlates with biological mutation load. (e) Correction accuracy negatively correlates with similarities between 'signal' and 'noise'. The three categories are use high (top 10%), low (bottom 10%) and middle (the remaining ones). (f) Correction accuracy drops with increasing FFPE artefacts in both types of FFPEs. We selected cancer types with at least 80% well-corrected samples in both unrepaired and repaired FFPEs from (c). The results are collected from simulated samples added with five different noise levels from  $10^3$ ,  $10^4$ ,  $5 \times 10^4$ ,  $10^5$  to  $10^6$ . The 95% confidence interval of each mean correction accuracy is marked using error bar here.

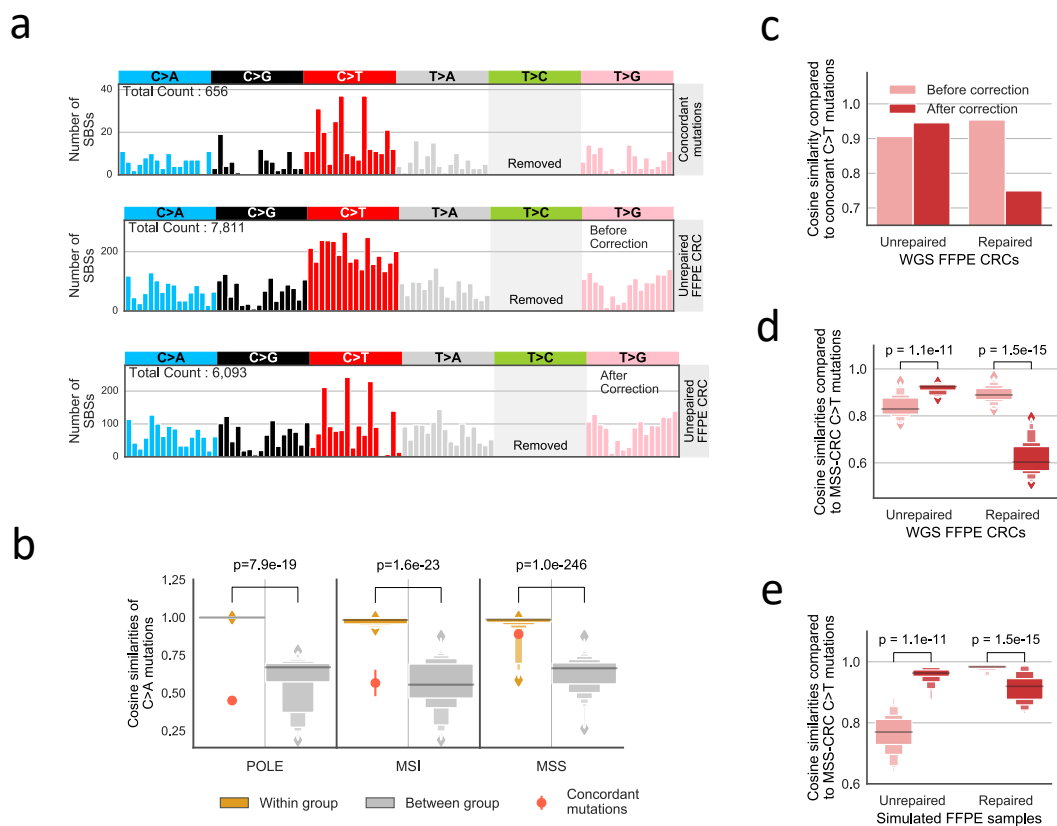

**Fig3. A case study of applying FFPE artefact correction method on two WGS CRC FFPE samples.** The two FFPE samples are from the same CRC patient. One of FFPEs is unrepaired and the other one is repaired. (a) Correction result for the unrepaired FFPE sample. The three panels are concordant mutation catalogues (top), unrepaired FFPE CRC profiles before correction (middle) and after correction (bottom). Concordant mutations refer to variants are shared between repaired and unrepaired FFPEs with at least 5 reads supporting the variant, and their profile is taken as an approximation of true mutational catalogue of the tumour. We removed T>C mutations to show clear pattern of other mutation channels due to their large numbers. (b) Concordant C>A mutation profile is highly similar to MSS-CRC C>A mutation patterns. PCAWG CRCs are grouped based on their known labels, namely POLE, MSI and MSS. The sample-pair cosine similarities of C>A mutation patterns within and between subgroups are shown in orange and grey box plot, respectively. The  $p$ -values of differences for each subgroup are shown above each box-pair using two-sided Mann-Whitney  $U$  test. The error bar shows standard deviation. (c) Comparing correction results of two FFPE samples to concordant mutations. As the correction acts on C>T mutation channels, we compared the cosine similarity changes of original profile (pink colour) and corrected profile (red colour) on C>T channels. (d) Comparing correction results of two FFPE samples to MSS-CRCs. (e) Comparing correction results of simulated MSS-CRC FFPE profiles. We compared each simulated MSS-CRC FFPE sample to all other MSS-CRC profiles but their real biological profile to treat them the same way as our WGS FFPE samples, for which the FF sample is not available.

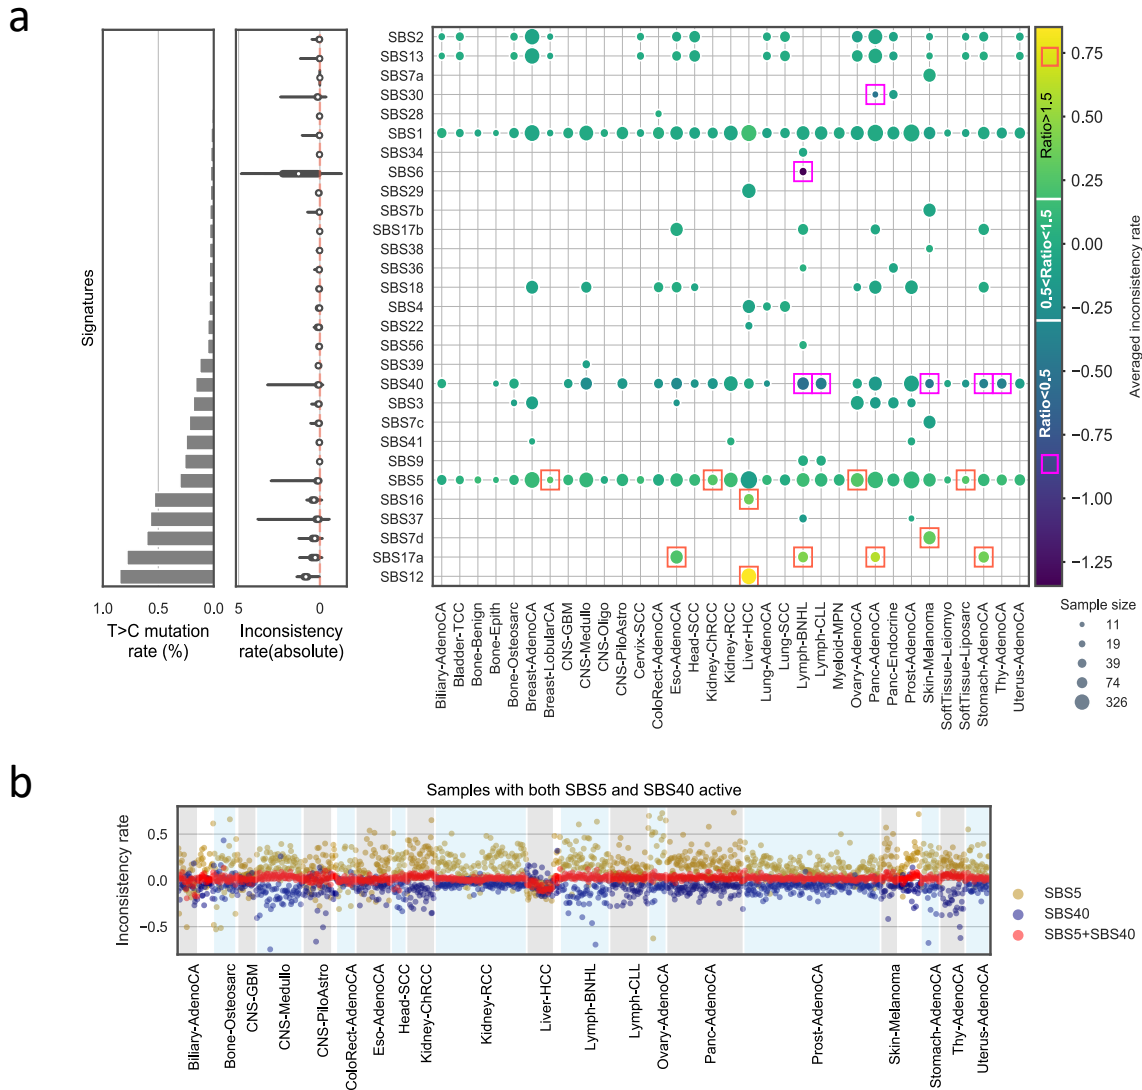

**Fig4. Comparison of signature activities inferred by signatures with and without T>C mutations.** We inferred signature activities using 96-channel (96c) and 80-channel (80c; without T>C) signatures on PCAWG mutational profiles. Here we use inconsistency rate as a measurement for how well the inferred activities agree with each other. Inconsistency rate is calculated as  $\log_{10}(\text{activity}_{80c}/\text{activity}_{96c})$ . (a) Activities inferred by 96c and 80c signatures are consistent for majority of signatures. Left panel: sum of mutational probabilities in T>C channels for each signature. Middle panel: violin plot of absolute inconsistency rate for all signatures. Right panel: heatmap of mean inconsistency rate for all signatures in different cancer types. Orange rectangle marks the average activity ratio ( $\text{activity}_{80c}/\text{activity}_{96c}$ ) above 1.5 ( $\sim 0.18$  on  $\log_{10}$  scale), which means 80c activity is bigger than 1.5 times of 96c activity. The purple rectangle marks the averaged activity ratio below 0.5 ( $\sim -0.30$  on  $\log_{10}$  scale), which means 80c activity is smaller than 50% of 96c activity. The radius of each circle represents the sample size (in log scale). (b) Activity flows between two similar signatures (SBS5 and SBS40). The inconsistency rates for SBS5 in all samples are in golden dots, and those for SBS40 are in blue dots. The inconsistency rate for the sum activity of SBS5 and SBS40 is shown in red dots.

# Supplemental Figures

a

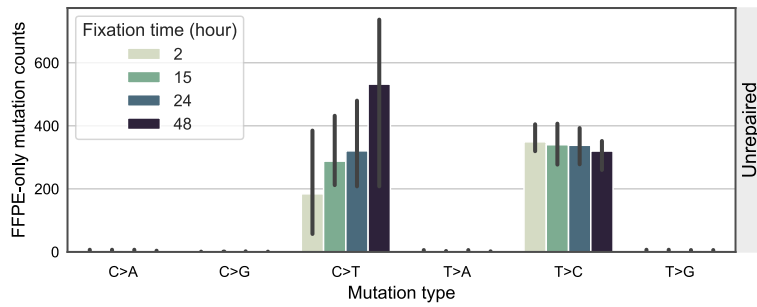

b

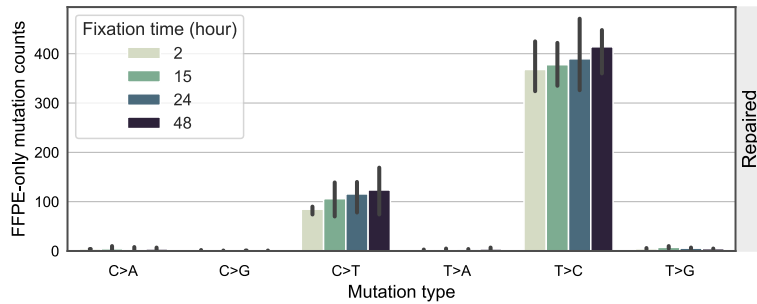

**Supplemental Fig1. FFPE-only mutations with increasing formalin fixation time.** FFPE-only mutations here refer to those are not present in matched FF sample and the data is from fixation group in study 1 [11] (see Methods & Materials). (a) Mutation count for six mutation types in unrepaired FFPE samples (without UDG treatment). For each mutation type, we show the mutation counts detected in four FFPE samples being fixed in formalin for 2, 15, 24 and 48 hours respectively. All data is collected from three patients. The error bar shows standard deviation for measurements made on three individuals. (b) Mutation count in repaired FFPE samples (with UDG treatment).

**a**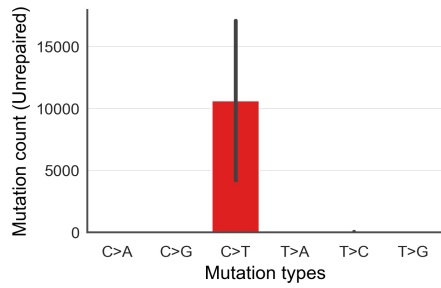**b**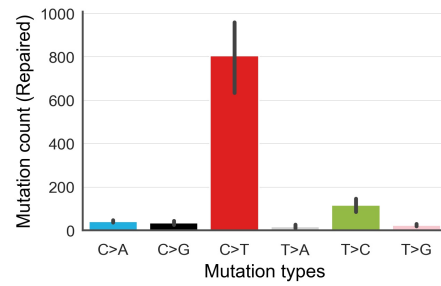

**Supplemental Fig2. FFPE-only mutations in six basic mutation types in study 2.** FFPE-only mutations here refer to those not present in matched FF sample. The data is collected from four patients in study 2 [8] (see Methods & Materials). (a) for unrepaired FFPEs. (b) for repaired FFPEs. The error bar shows standard deviation for measurements made on four individuals.

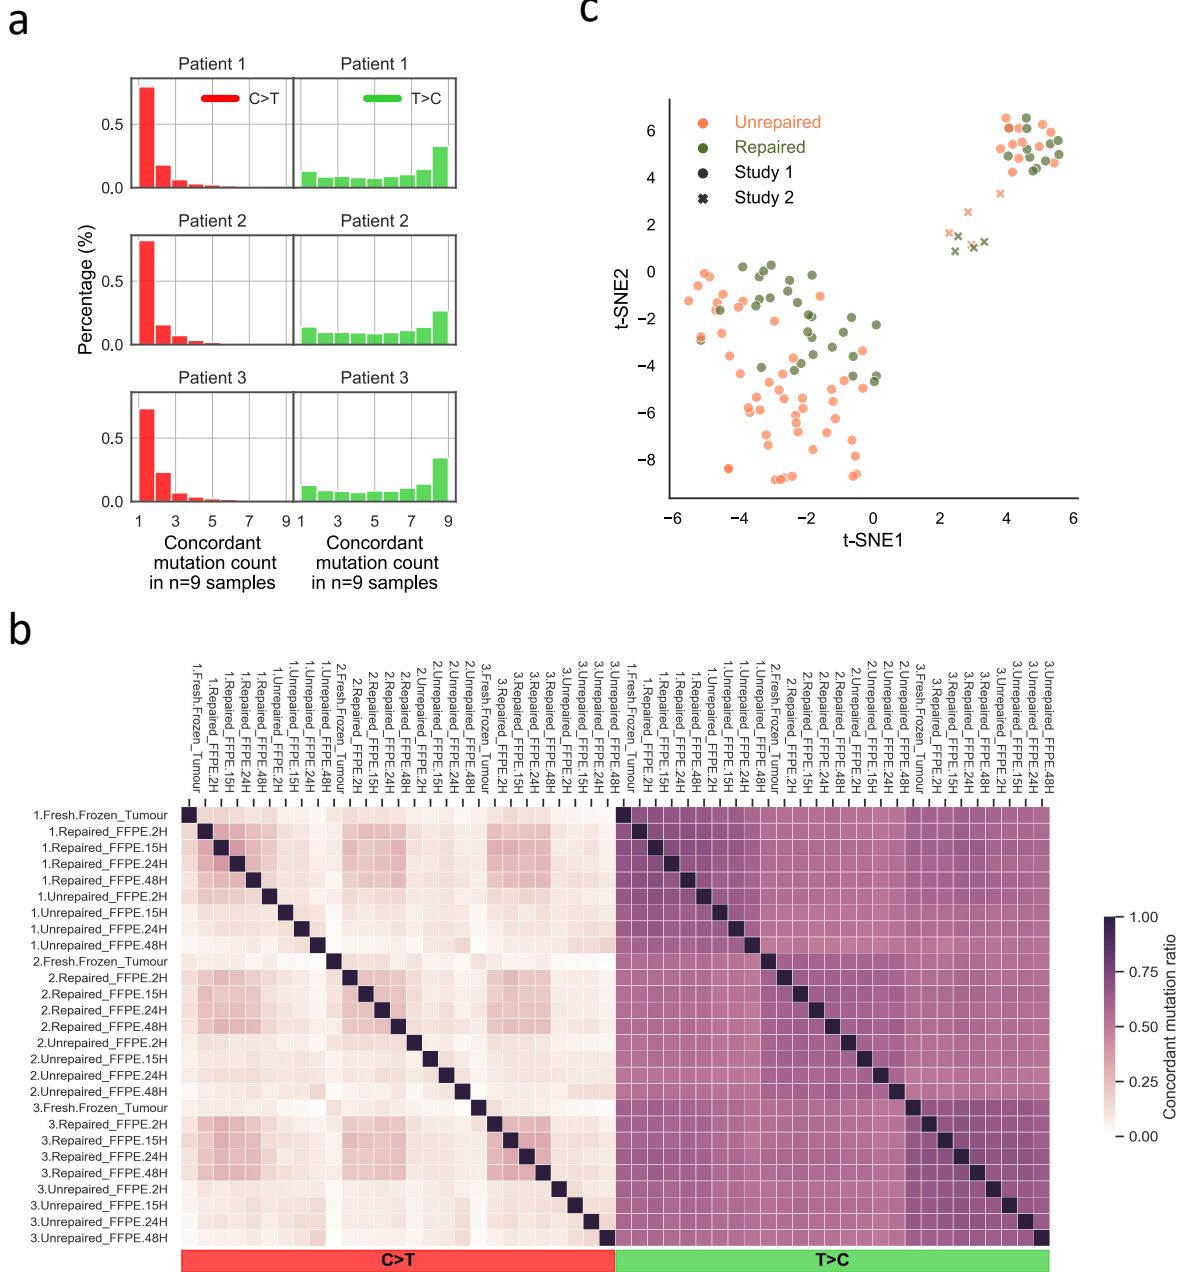

**Supplemental Fig3. T>C mutations are highly repeated among samples with no specific error profile.** We use all mutation data of fixation group ( $n=27$ ) from study 1 for (a) and (b) as T>C are only over-represented in study 1. We used FFPE-only T>C mutations of all FFPEs ( $n=110$ ) from study 1 and 2 in (c). (a) Normalised histogram of concordant mutation count per patient. We take all T>C and C>T mutations from the whole mutation list and counted the occurrences for the unique set of all mutations among all samples from each patient ( $n=9$ ; 4 repaired FFPE + 4 unrepaired FFPE + 1 FF). (b) Pair-wise comparison of concordant mutation ratios for all samples from three patients ( $n=27$ ). Concordant mutation ratio is calculated using concordant mutation numbers of a sample-pair divided by unique mutation count in the sample pair. (c) Clusters of T>C mutation profiles over 110 FFPE samples. It is the same plot as Fig 1b but using 16-channel of T>C mutation data whereas Fig 1b using 80-channel without T>C mutations. The cluster is represented by t-SNE on cosine metric of 16-channel T>C mutational profiles which are normalized using targeted-region mutational opportunities and whole genome mutational contexts (see Methods & Materials).



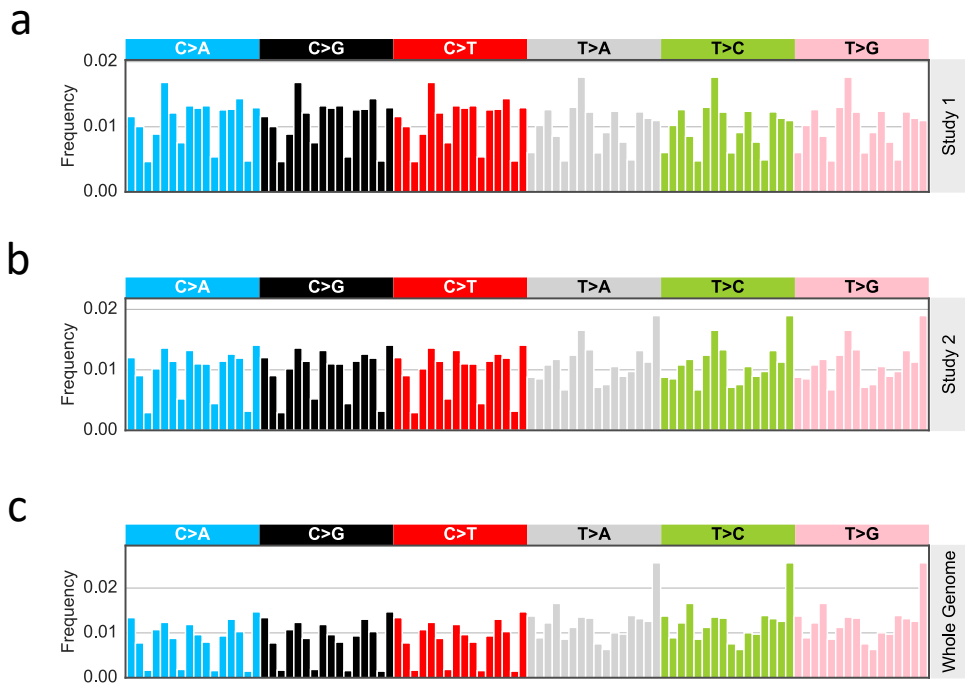

**Supplemental Fig4. Mutational opportunities** (a) of study 1 targeted regions (b) of study 2 targeted regions (c) of whole genome sequence context

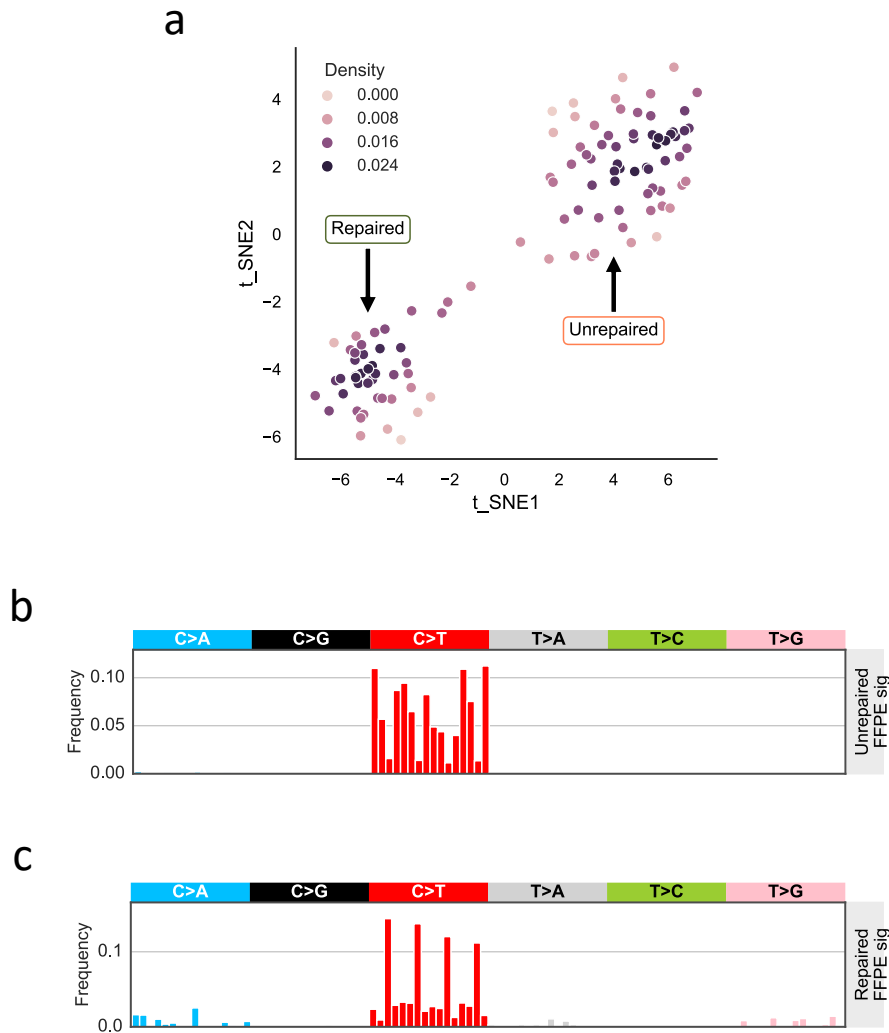

**Supplemental Fig5. Deriving FFPE signatures from well-representative samples from t-SNE clustering result.** (a) Scatter plot of spatial density of t-SNE clustered samples measured using gaussian kernel. The t-SNE cluster is the same as Fig 1b but with spatial density instead. Samples with density value over 0.018 are classified as well-representative samples, and one FFPE signature candidate are generated by averaging the mutational channels. (b) Final version of unrepaired FFPE signature. We repeated (a) for 100 times using different random seeds, thus we have 100 unrepaired FFPE signature candidates. The final version of unrepaired FFPE signature takes the averaged values of all 100 candidates. (c) Final version of repaired FFPE signature. It is derived from the same method as used in (b).

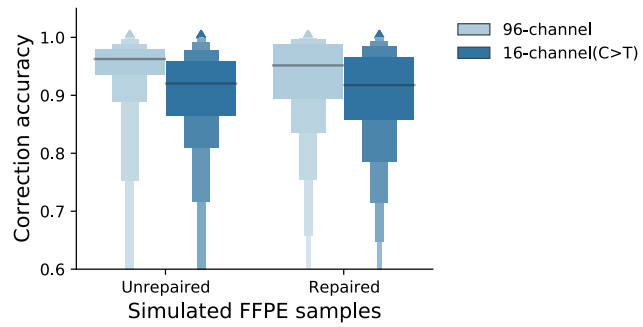

**Supplemental Fig6. Comparison of correction accuracy measured using all mutations (96-channel) versus using C>T mutations.**

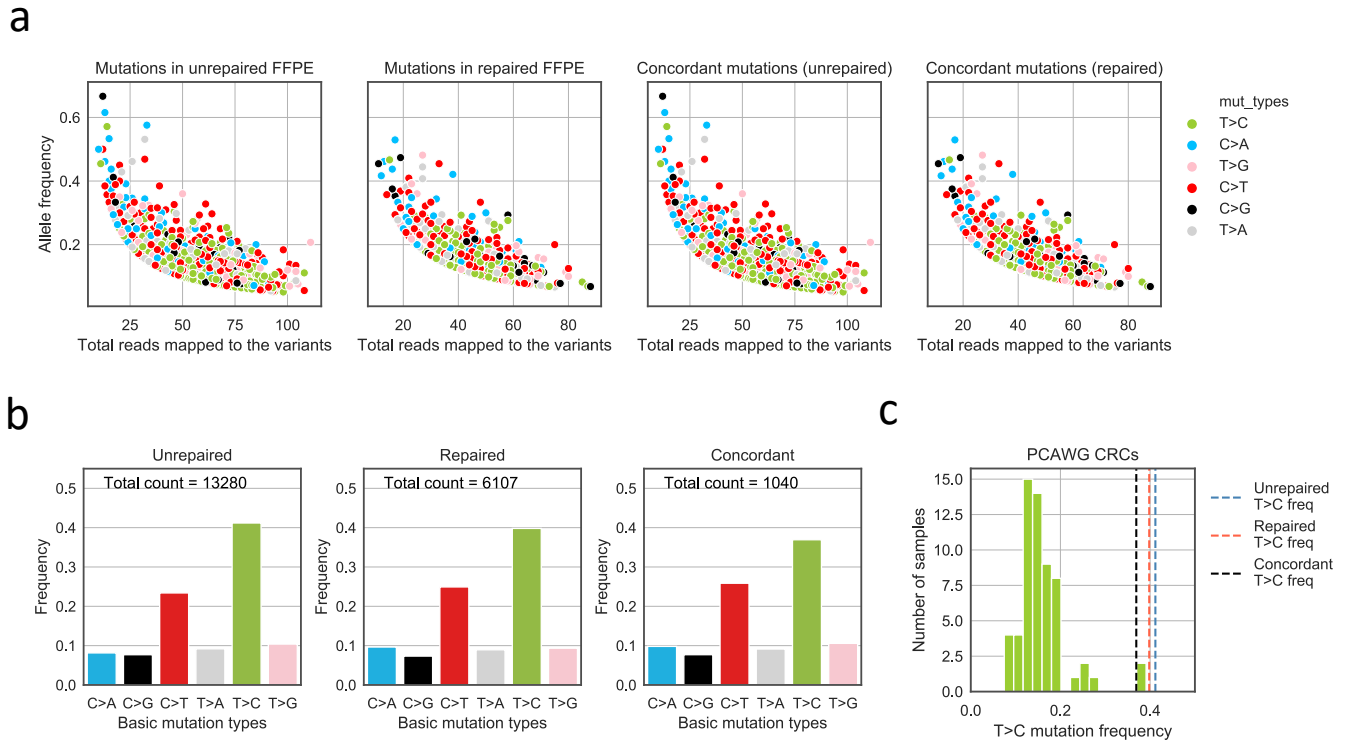

**Supplemental Fig7. Mutations from two WGS FFPE CRC samples.** (a) Allele frequency versus total reads number of detected variants. The four panels from left to right show mutations detected from unrepaired FFPE, repaired FFPE and concordant mutations in unrepaired and concordant mutations in repaired FFPEs, respectively. Concordant mutations refer to variants are detected in both repaired and unrepaired FFPEs with at least 5 supporting reads. (b) Total count of SBS variants in unrepaired, repaired and concordant mutations. (c) T>C mutation frequencies of PCAWG CRC samples. Three dash lines indicate T>C mutation frequencies of unrepaired, repaired and concordant mutations from our sequenced FFPE samples.

a

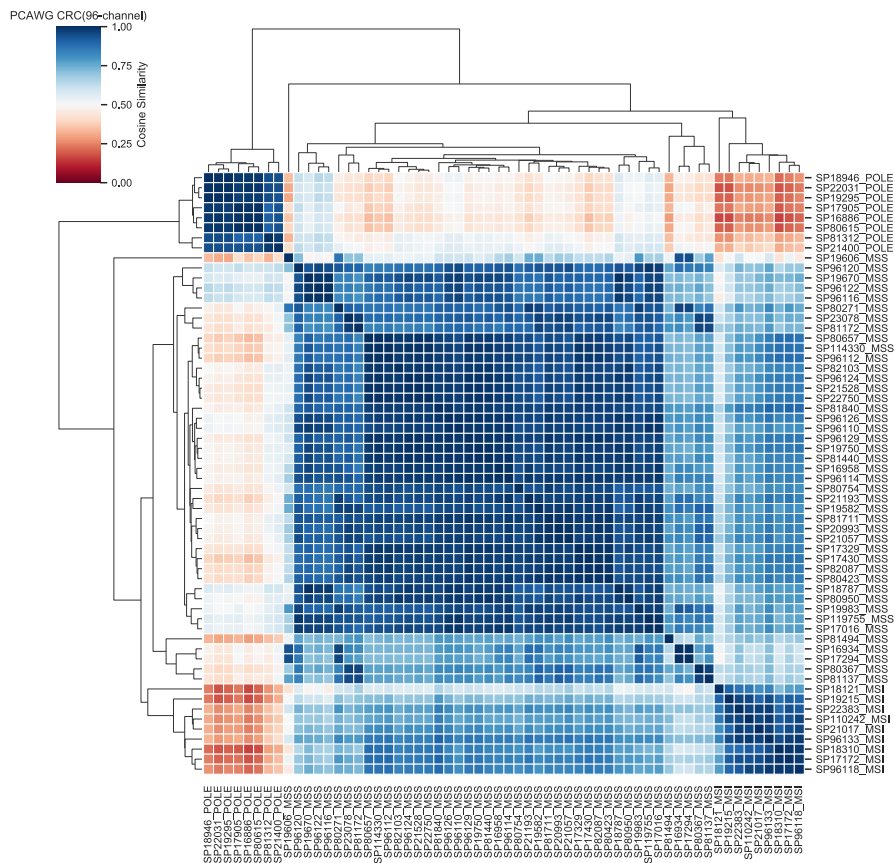

b

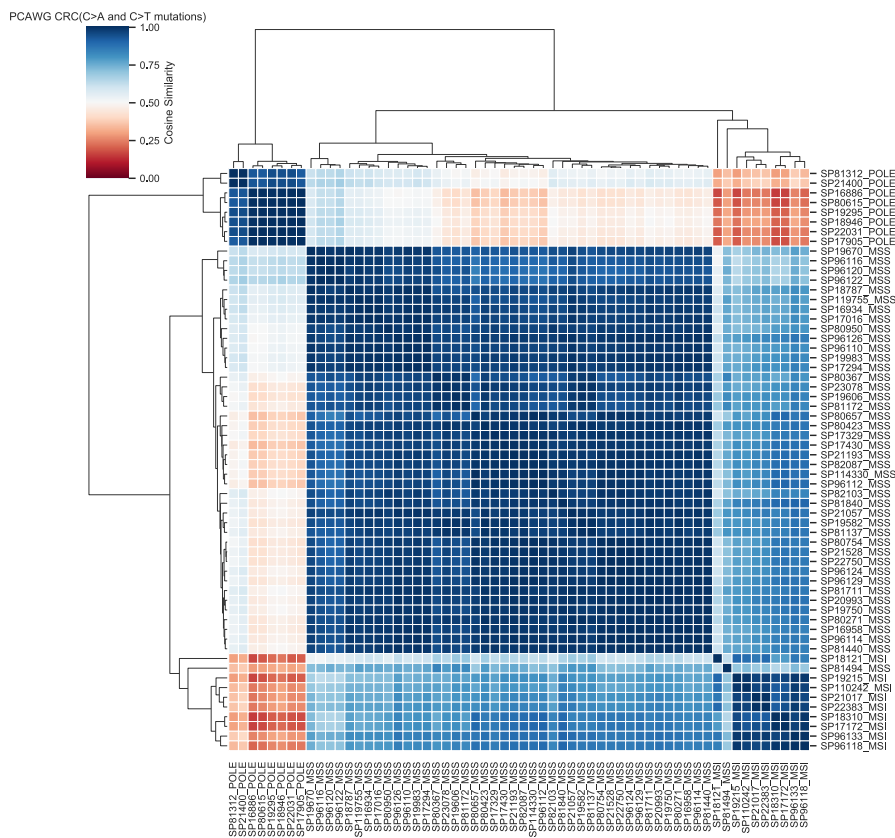

**Supplemental Fig8. Clustering PCAWG CRC mutational catalogues. (a) using 96-channel profiles. (b) using C>A and C>T mutation profiles.**

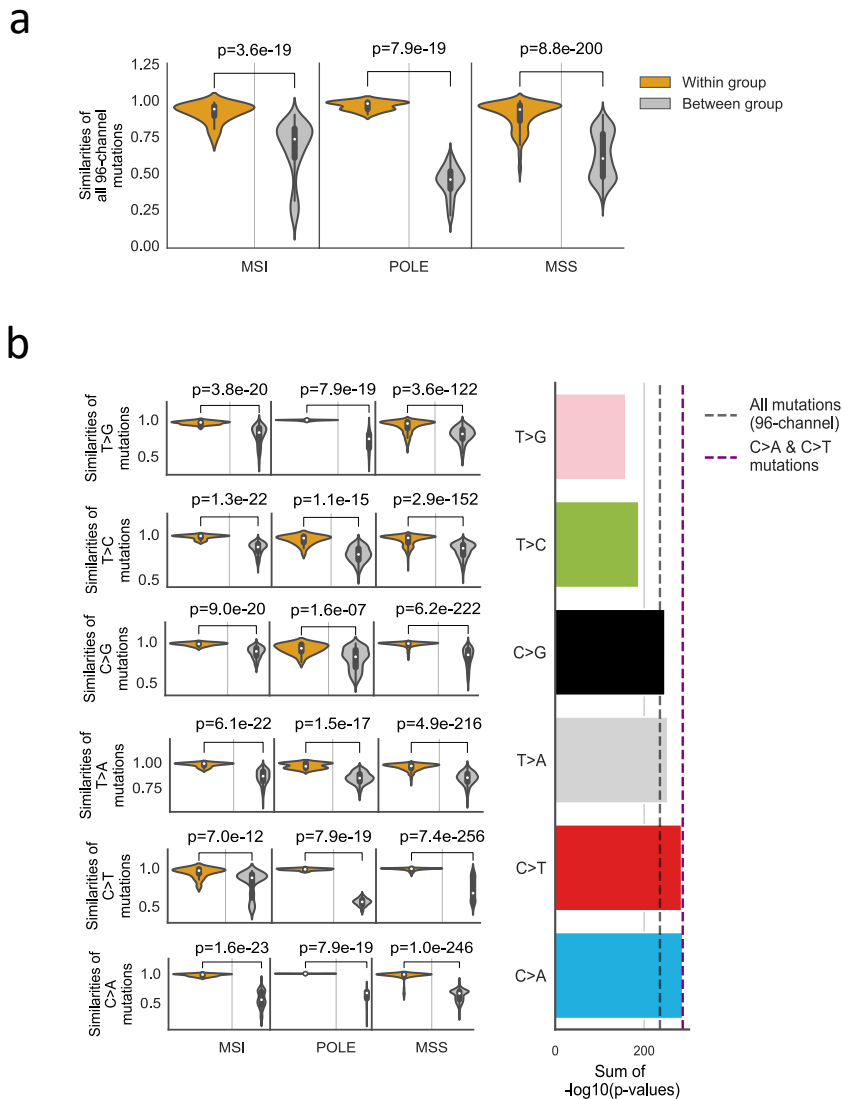

**Supplemental Fig9. Comparison of sample-pair similarities within and between subgroups of PCAWG CRCs.** PCAWG CRC are grouped based on their known labels, namely POLE, MSI and MSS. (a) Comparison made using full 96 channel mutational profiles. The sample-pair cosine similarities of mutation patterns within and between groups are shown in orange and grey box plot, respectively. The difference for each subgroup is measured by two-sided Mann-Whitney  $U$  test. (b) C>A and C>T mutation patterns are highly conserved/similar within each subtype. The same comparison in (a) is made but using six basic mutation types separately. We use the sum of  $-\log_{10}(p\text{-value})$  to sort the six mutation types, shown in the right panel. We also use black and purple dash lines to mark sum of  $-\log_{10}(p\text{-value})$  value by using 96-channel and by using C>A and C>T (32-channel).

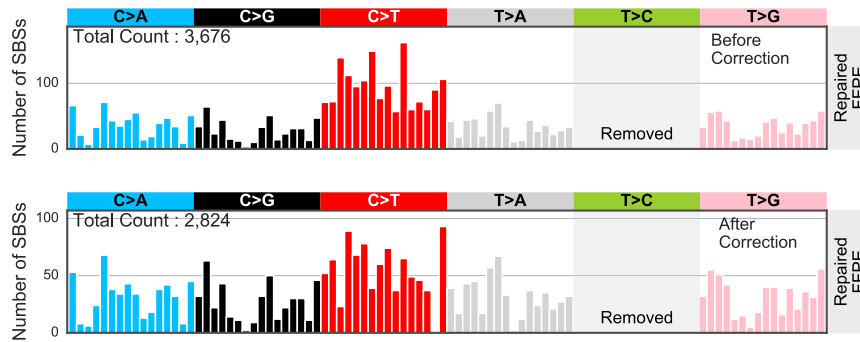

**Supplemental Fig10. FFPE noise correction results of repaired FFPE CRC sample.** The top panel shows mutational profile before correction. And the lower panel shows the corrected profile.

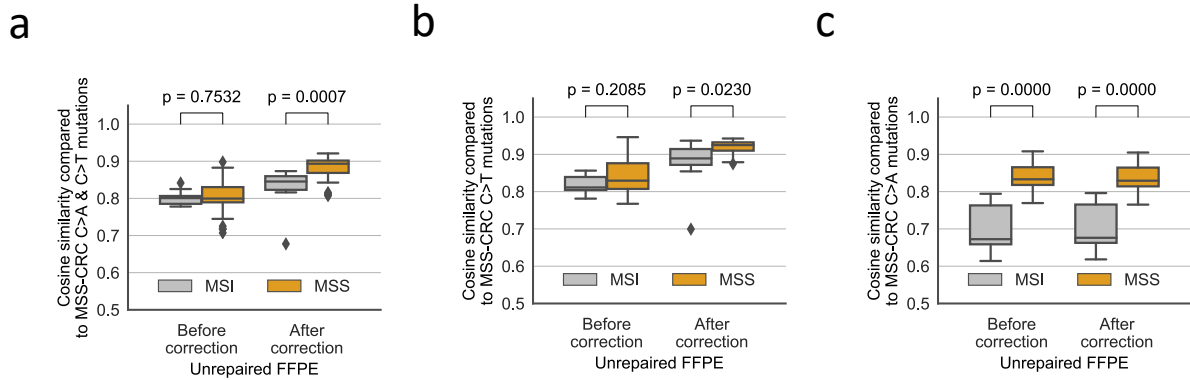

**Supplemental Fig11. Correction on unrepaired FFPE CRC sample contributes to classify MSS subtype from MSI.** The difference for each subgroup is measured by two-sided Mann-Whitney  $U$  test. (a) Correction makes significant improvement for the classification by using C>A and C>T mutations. (b) Correction on C>T mutations also improves the classification. (c) C>A mutation profiles in unrepaired FFPE sample can also be used as classifier. As our correction acts on C>T channels mostly, so the C>A mutation pattern are almost the same before and after correction (cosine similarity:  $\sim 1$ ).



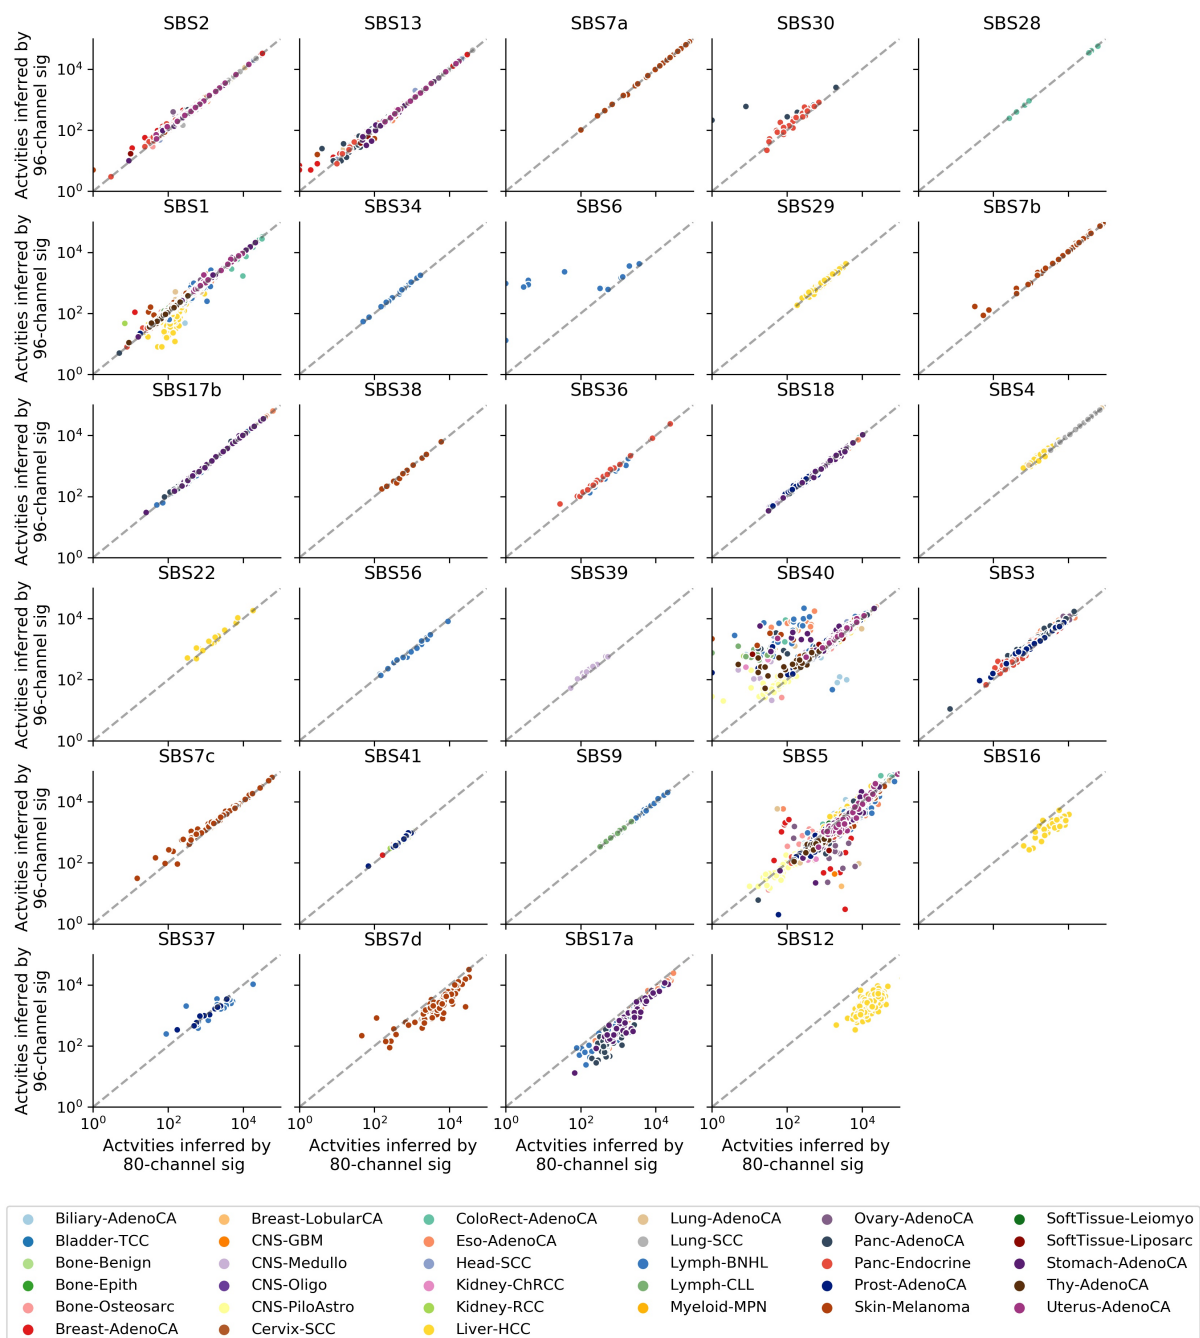

**Supplemental Fig 12. Comparison of refitted activity counts using 80-channel and 96-channel signatures for PCAWG data.**

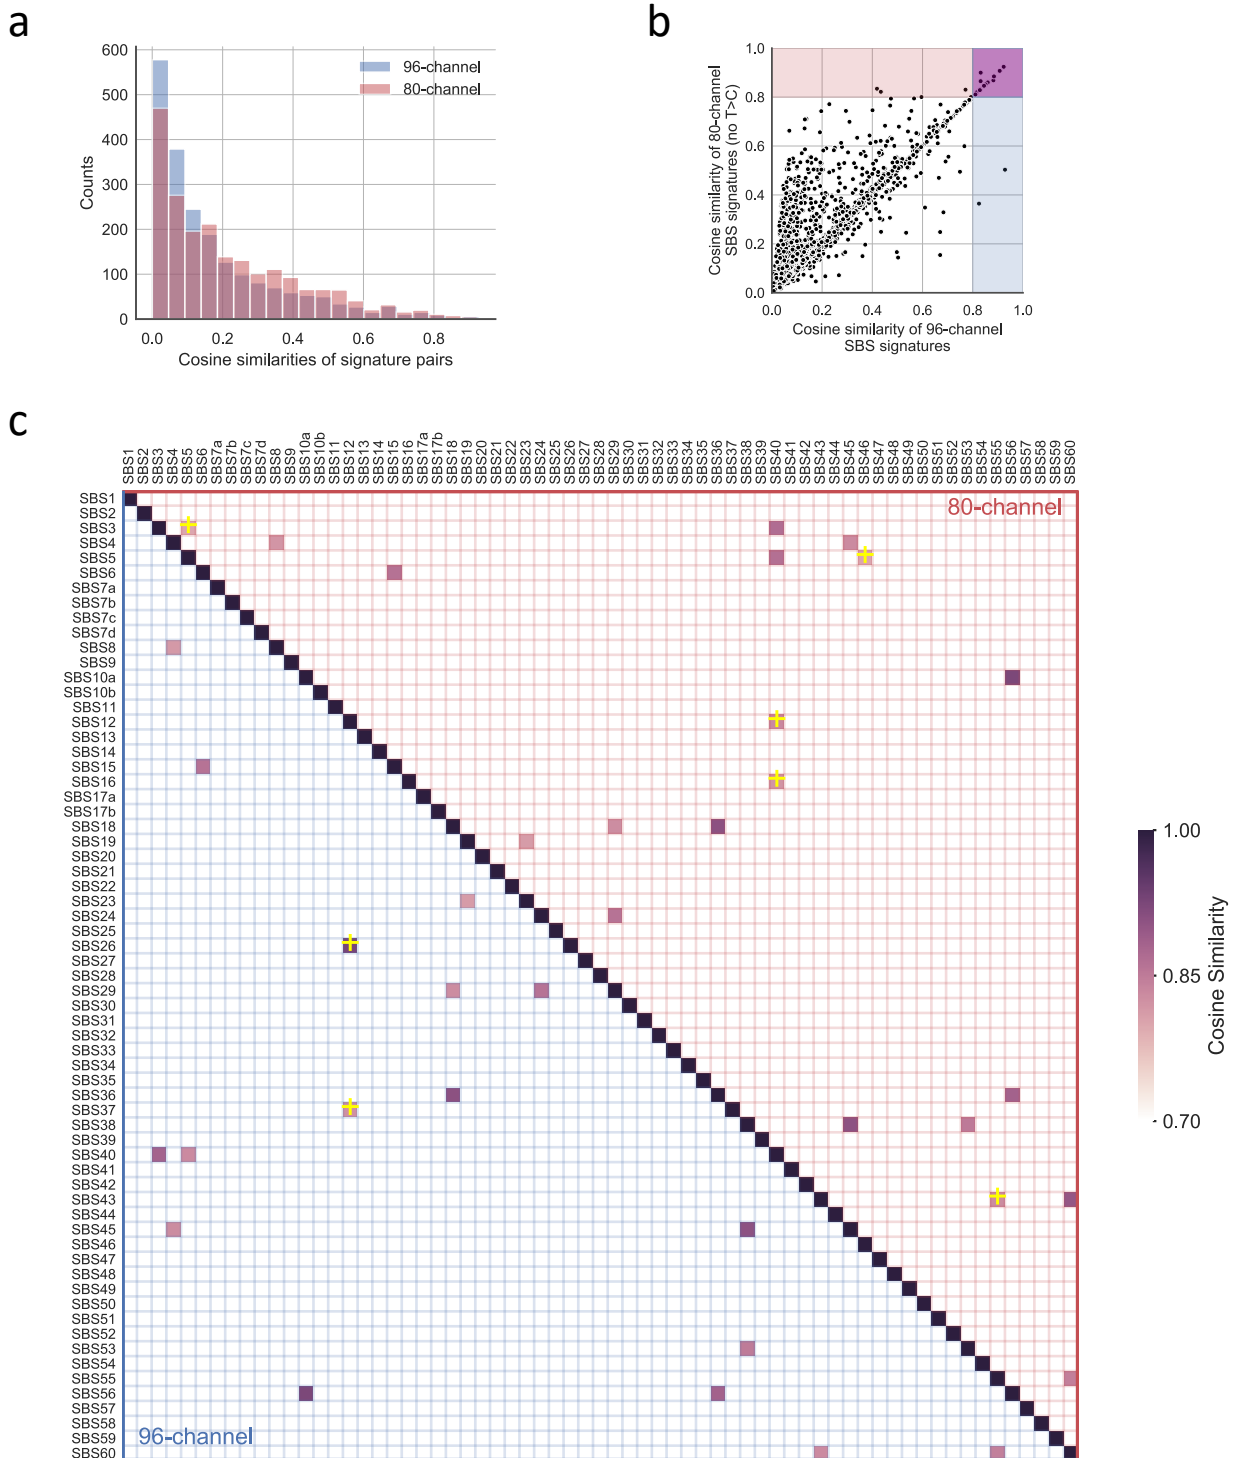

**Supplemental Fig 13. Comparison of signature similarities using 96-channel and 80-channel (no T>C) spectra.** (a) Histogram of cosine similarities for signature pairs using 96-channel (96c; blue) and 80-channel (80c; pink). (b) Scatter plot of pair-wise cosine similarities using 96c and 80c signatures. Highly similar (>0.8) signature pairs are highlighted in the plot: 1) purple area shows signature pairs that are highly similar in both signature settings (96c and 80c); 2) blue area contains signature pairs are highly similar by using 96c profiles, but not highly similar by using 80c; and 3) pink area shows pairs with high similarity by using 80c not 96c. (c) Highly similar signature pairs using 96c and/or 80c. The upper and lower triangle show the signature pairs calculated using 80c and 96c, respectively. The signature pair with '+' symbol represents it only exists by using 80c or by using 96c. The pairs with '+' symbol in upper triangle are the dots from pink area in (b), and those in lower triangle are from blue area in (b).
